1 **Perturbing HIV-1 genomic RNA subcellular localization inhibits virus particle**  
2 **production**

3

4 Jordan T. Becker & Nathan M. Sherer

5

6 McArdle Laboratory for Cancer Research, Institute for Molecular Virology, & Carbone  
7 Cancer Center

8 University of Wisconsin – Madison

9 1525 Linden Drive, Madison, WI 53706

10

11 Short title: HIV-1 gRNA localization regulates virion production

12

13 \*To whom correspondence should be addressed: 501 Robert M. Bock Lab, 1525 Linden  
14 Drive, Madison, WI 53706. Tel: (608) 890-2551. Email: [nsherer@wisc.edu](mailto:nsherer@wisc.edu)

15

16

17 **Abstract.** mRNA subcellular localization is a crucial determinant of eukaryotic gene  
18 expression. For retroviruses including HIV-1, the unspliced genomic RNA (gRNA)  
19 serves both as the mRNA encoding Gag/Gag-Pol capsid proteins and the genetic  
20 material packaged by Gag into virions assembling at the plasma membrane. Gag is  
21 sufficient to drive the assembly of virus-like particles in the absence of gRNA binding.  
22 Thus, what role gRNA cytoplasmic trafficking plays during assembly is unknown. Here  
23 we demonstrate that aberrantly tethering HIV-1 gRNAs to membranes or the actin  
24 cytoskeleton alters Gag subcellular distribution and reduces virus particle production.  
25 This block was restricted to gRNAs competent for Gag synthesis and mapped to the  
26 Rev response element; a *cis*-acting RNA structure that regulates gRNA nuclear export.  
27 These results expose an unexpected mechanistic link between HIV-1 gRNA nuclear  
28 history, cytoplasmic trafficking, and Gag assembly. Perturbing viral mRNA subcellular  
29 distribution could represent a novel antiviral strategy.

30

31

## 32 INTRODUCTION

33

34 The spatial distribution of messenger RNAs (mRNAs) within the cell is a core  
35 determinant of mRNA turnover, cytoplasmic utilization, and often the formation of  
36 functional macromolecular complexes (1–5). Viruses face severe challenges in this  
37 regard during the productive phases of infection, wherein viral mRNAs, genomes, and  
38 core structural elements must be compartmentalized in space and time to form and  
39 release infectious virions. For the human immunodeficiency virus type 1 (HIV-1), virion  
40 assembly occurs at the plasma membrane (PM) (6) where a dimer of ~9kb, unspliced  
41 genomic RNA (gRNA) is encapsidated into enveloped, proteinaceous shells consisting  
42 of ~2,000 Gag (and Gag-Pol) capsid polyproteins (7, 8). Upstream of assembly,  
43 Gag/Gag-Pol and gRNAs orchestrate an elegant interplay with gRNAs functioning both  
44 as mRNAs encoding Gag and Gag-Pol as well as the core genetic substrate bound by  
45 Gag and trafficked to the site of assembly (9–12). Curiously, Gag is sufficient to drive  
46 the assembly of virus-like particles (VLPs) even in the absence of gRNA binding (13–  
47 17). As such, how Gag/gRNA trafficking behaviors in the cytoplasm are coordinated for  
48 efficient assembly and encapsidation is poorly understood.

49 To initiate assembly, Gag requires association with the PM via a phospholipid  
50 membrane anchor and must also interact with an RNA scaffold in the cytoplasm (16, 18,  
51 19). Four functional domains of the Gag polyprotein coordinate this process. Matrix  
52 (MA) targets Gag to the cytosolic face of the PM through interactions with the  
53 phospholipid phosphatidylinositol 4,5-bisphosphate (PI(4,5)P<sub>2</sub>) (20–23). Capsid (CA)  
54 coordinates Gag-Gag interactions during capsid assembly (24, 25). NC binds to the

55 gRNA dimer and/or cellular RNA (26–29) and the p6 “late” domain recruits the cellular  
56 endosomal sorting complex required for transport (ESCRT) machinery that catalyzes  
57 membrane abscission and particle release (15, 30–33). Under infectious conditions,  
58 Gag encapsidates a gRNA dimer with high efficiency (34–36) through NC’s binding to a  
59 *cis*-acting RNA packaging signal known as Psi located in the gRNA’s 5’ untranslated  
60 region (29, 37–39). NC also binds to cellular RNAs and can package some highly  
61 structured RNAs (*e.g.*, U6 snRNAs and 7SL RNAs) into virions with a high degree of  
62 specificity (40–43). Interestingly, MA can also bind to RNAs (in particular, cellular  
63 tRNAs) (39, 44–46), an activity that may regulate MA-membrane interactions and thus  
64 affect assembly (45, 46).

65         Gag and gRNAs are coordinately trafficked to sites of assembly in the form of  
66 dynamic viral genomic ribonucleoprotein (gRNP) complexes consisting of HIV-1 gRNAs  
67 bound to low-order multiples of Gag and cellular RNA binding proteins (47–49). gRNP  
68 trafficking complexes likely form in conjunction with nuclear export and can traffic to PM  
69 assembly sites via diffusion (50). However, membrane trafficking and/or the  
70 cytoskeleton have also been implicated in gRNP cytoplasmic trafficking in some studies  
71 (51–53). Particle assembly is initiated when cytoplasmic Gag concentrations reach a  
72 critical level, the so-called cooperative threshold (54) wherein Gag-Gag interactions  
73 trigger the activation of a myristoyl switch within MA that subsequently anchors the  
74 gRNP complex to the PM (21, 55–57). Recent imaging studies suggest that this event  
75 occurs in concert with or just prior to gRNA dimerization (58) and is followed by the  
76 gradual recruitment of Gag molecules to the assembling virion over 10-30 minutes (36,  
77 59–62).

78           Although Gag-gRNA binding is not obligatory for assembly (63–65), we and  
79 others have provided evidence for important functional links between gRNA  
80 nucleocytoplasmic trafficking and Gag’s assembly competency (66–69). Retroviral  
81 gRNAs retain introns and have evolved to hijack specialized cellular RNA nuclear export  
82 machineries (70–72). HIV-1 gRNAs are exported from the nucleus through an  
83 interaction between the cellular karyopherin CRM1, the viral Rev protein, and a *cis*-  
84 acting RNA secondary structure, the Rev-response element (RRE) found in gRNAs and  
85 a subset of incompletely spliced transcripts that encode the viral Vif, Vpu, and Envelope  
86 proteins (73–75). Genetically simpler retroviruses lack Rev-equivalent proteins and  
87 instead encode *cis*-acting RNA constitutive transport elements (CTEs) that are CRM1-  
88 independent and directly recruit the NXF1(TAP)/NXT1(p15) mRNA nuclear export  
89 machinery, similar to the bulk of cellular spliced mRNAs (76–80). Rendering HIV-1  
90 gRNAs or surrogate *gag-pol* mRNAs Rev-independent (*e.g.*, by replacing the RRE with  
91 one or more CTEs or by codon-optimizing the *gag* reading frame to abolish export  
92 inhibitory sequences) markedly alters Gag assembly competency in select cell types  
93 (66, 67, 69).

94           To begin to decipher links between retroviral gRNA nuclear history and virus  
95 particle assembly, we recently used live cell imaging to directly compare the dynamics  
96 of HIV-1 gRNA nucleocytoplasmic trafficking in either the Rev/RRE- or CTE-directed  
97 nuclear export pathways in single cells over the entire productive phase of infection  
98 (81). We found that Rev-dependent gRNAs accumulated in the nucleus prior to  
99 “bursting” *en masse* to flood the cytosol in a diffusive pattern. By contrast, replacing the  
100 RRE with multiple copies of the CTE derived from the betaretrovirus Mason-Pfizer

101 monkey virus (MPMV) abolished burst export and linked gRNAs to microtubules for  
102 rapid minus end-directed transport to the microtubule organizing center (MTOC). These  
103 results demonstrated for the first time that gRNA nuclear export elements program  
104 strikingly distinct gRNP trafficking behaviors in the cytoplasm. We have postulated that  
105 these differential activities reflect unique requirements of each virus's assembly  
106 pathway and efforts are ongoing to discern the unique features of these pathways that  
107 could inform the development of novel antiviral strategies.

108         In this study, we tested a series of competing hypotheses regarding the  
109 importance of HIV-1 gRNA cytoplasmic abundance, gRNA subcellular localization, and  
110 gRNA nuclear history in regulating the timing and efficiency of HIV-1 particle assembly.  
111 We show that altering gRNA cytoplasmic abundance, in a non-coding context, has little  
112 to no effect on Gag assembly competency when provided in *trans*. By contrast,  
113 perturbing the cytoplasmic localization of gRNAs competent for Gag synthesis can  
114 potentially reduce the efficiency of HIV-1 virus particle release, despite having only minor  
115 effects on cell-associated levels of Gag. The block was explained by perturbations to  
116 Gag trafficking leading to aberrant sites of capsid biogenesis and/or defects to capsid  
117 assembly or release. Surprisingly, the effect was specific to Gag derived from Rev/RRE-  
118 dependent mRNAs, thus confirming that gRNA nuclear history and cytoplasmic  
119 trafficking behaviors are crucial determinants of the assembly pathway.

120

121

122

123

## 124 **MATERIALS AND METHODS**

125

126 **Cell culture, plasmids, and stable cell lines.** Human HeLa and HEK293T cell lines  
127 (obtained from the ATCC) were cultured in DMEM (Sigma-Aldrich, Madison, WI, USA)  
128 supplemented with 10% fetal bovine serum, 1% L-glutamine, and 1% penicillin-  
129 streptomycin. Full-length parental WT HIV-1 proviral plasmids were derived from the  
130 pNL4-3 molecular clone (82) inserted into the pBluescript plasmid backbone and  
131 bearing inactivating mutations in *env*, *vpr*, and expressing a Firefly Luciferase reporter  
132 from the *nef* reading frame (83). 24 copies of the MS2 bacteriophage RNA stem loop  
133 (MSL, a kind gift of Robert Singer, Albert Einstein University, New York, NY, USA) were  
134 engineered into the full-length pNL4-3 derived constructs as previously described (51).  
135 Rev-independent (RevInd) Gag-fluorescent protein (FP) plasmids were derived from a  
136 plasmid encoding partially codon-optimized Gag-GFP (a gift of Marilyn Resh, Memorial  
137 Sloan Kettering Cancer Center, New York, NY, USA) (63, 84). The FP reading frame  
138 was fused to RevInd *gag* cDNAs using overlapping PCR and inserted into pcDNA3.1  
139 using *NheI* and *XhoI* cut sites. In all instances, mutants of full-length HIV-1 and RevInd  
140 Gag plasmids were generated using overlapping PCR. Subgenomic GagFP-MSL HIV-1  
141 expression plasmids encoded Gag fused to mTagBFP2 (85), ECFP, or mCherry  
142 upstream of the MSL cassette and inserted into surrogate, subgenomic HIV-1 gRNA  
143 plasmid Gag-Pol-Vif-RRE (86). mTagBFP2 was a gift from Michael Davidson (Addgene  
144 plasmid # 55302). All GagFP fusions performed similarly. Plasmids pRev and pSynGP  
145 (RevInd Gag/Gag-Pol) have been described (65, 87). MS2-YFP targeting constructs  
146 were generated by amplifying cDNAs from pMS2-YFP (also a gift of Rob Singer, Albert

147 Einstein University, New York, NY, USA) (88) using overlapping PCR prior to  
148 subcloning into a pcDNA3.1 backbone using *HindIII* and *XhoI* cut sites. MS2-mCherry-  
149 NLS was generated by overlapping PCR to replace YFP with mCherry reading frames  
150 and subcloned into full-length HIV constructs using *NotI* and *XhoI* cut sites. MS2-YFP  
151 targeting constructs included an amino-terminal membrane targeting signal derived from  
152 the Src kinase (MGSSKSKPKD) (89), amino-terminal LifeAct actin-targeting domain  
153 (MGVADLIKKFESISKEE), and/or a carboxy-terminal nuclear localization signal (NLS;  
154 PKKKRKV) derived from SV40 Large T antigen (90). An amino-terminal codon-  
155 optimized matrix reading frame was engineered onto the MS2-YFP construct to yield  
156 MA-MS2-YFP. HeLa.MS2-YFP, HeLa.Gag-CFP, and HEK293T.Gag-CFP stable cell  
157 lines were generated as previously described (75, 81). Briefly, desired reading frames  
158 were subcloned into a retroviral vector upstream of an internal ribosomal entry site  
159 (IRES) and second reading frame encoding Puromycin-N-acetyltransferase (91). High  
160 performance clones were selected following limiting dilution in 2 $\mu$ g/mL puromycin.

161  
162 **Retroviral assembly assays.** Cells at 30-40% confluency were transfected with 2 $\mu$ g  
163 DNA in six well dishes using polyethylenimine (PEI; #23966, Polysciences Inc,  
164 Warrington, PA, USA). pcDNA3.1 or pBlueScript were used as empty vector controls.  
165 Culture media were replaced at 24 hours post-transfection and cell lysates and  
166 supernatants were harvested for immunoblot analysis at 48 hours (69). Briefly, 1mL of  
167 harvested culture supernatant was underlaid with 20% sucrose (w/v) in PBS, subjected  
168 to centrifugation at >21,000g for two hours at 4°C, and viral pellets were resuspended in  
169 35 $\mu$ L dissociation buffer. Cells were harvested in 500 $\mu$ L radioimmunoprecipitation assay



170 (RIPA) buffer, lysed by passage through 26G needle, subjected to centrifugation at  
171 1,500g for 20 minutes, and combined 1:1 with dissociation buffer. Proteins were  
172 resolved by sodium dodecyl sulfate-polyacrylamide gel electrophoresis (SDS-PAGE)  
173 and transferred to nitrocellulose membranes. Gag was detected using a mouse  
174 monoclonal antibody recognizing HIV-1 capsid/p24 (183-H12-5C; 1:1000 dilution) from  
175 Dr. Bruce Chesebro and obtained from the NIH AIDS Research and Reference Reagent  
176 Program (Bethesda, MD, USA) (92) and anti-mouse secondary antibodies conjugated to  
177 an infrared fluorophore (IRDye680LT, 1:10000 dilution, Li-Cor Biosciences, Lincoln, NE,  
178 USA) for quantitative immunoblotting. As a loading control, heat shock protein 90A/B  
179 (HSP90) was detected using a rabbit polyclonal antibody (H-114, 1:2500 dilution, Santa  
180 Cruz Biotechnology, Santa Cruz, CA, USA) and anti-rabbit secondary antibodies  
181 conjugated to an infrared fluorophore (IRDye800CW, 1:7500 dilution, Li-Cor  
182 Biosciences). Fluorescent proteins (CFP, YFP, etc.) were detected using a rabbit  
183 polyclonal antibody against full-length GFP (FL, 1:1000 dilution, Santa Cruz  
184 Biotechnology) and anti-rabbit secondary antibody conjugated to an infrared fluorophore  
185 (IRDye800CW). Where indicated, the protease inhibitor saquinavir (NIH AIDS Research  
186 and Reference Reagent program, Bethesda, MD) was added to 5 $\mu$ M at 24 hours post-  
187 transfection. Typically, retroviral assembly assays were performed with transfections  
188 and harvesting occurring in one week while processing and immunoblotting occurred in  
189 the following week. Most results were obtained from three biological replicates as  
190 defined as cells plated in six well dishes transfected on separate days (i.e. replicate 1  
191 was transfected on a separate day from replicate 2).

192

193 **Microscopy and single molecule fluorescence in situ hybridization (smFISH).**

194 Cells were plated in 24-well glass-bottom dishes (Mattek Corporation, Ashland, MA,  
195 USA) or 8-well microslides (IBIDI, Madison, WI, USA) and transfected using PEI.  
196 Transfection mixes contained 1 $\mu$ g (24-well) or 333ng (IBIDI) plasmid DNA. De-  
197 convolution fixed-cell imaging experiments were performed on a Nikon Ti-Eclipse  
198 inverted wide-field microscope (Nikon Corporation, Melville, NY, USA) using a 100x  
199 Plan Apo oil objective lens (numerical aperture NA 1.45). These cells were fixed 24-36  
200 hours post-transfection in 4% paraformaldehyde in PBS. Live cell imaging experiments  
201 were also performed on a Nikon Ti-Eclipse inverted wide-field microscope using a 20x  
202 Plan Apo objective lens (NA 0.75) with images acquired every 60 minutes for more than  
203 24 hours. Images were acquired using an ORCA-Flash4.0 CMOS camera (Hamamatsu  
204 Photonics, Skokie, IL, USA) and using the following excitation/emission filter sets  
205 (nanometer ranges): 430/470 (CFP), 510/535 (YFP), 585/610 (mCherry). For fixed cell  
206 experiments using smFISH to visualize HIV-1 gRNA, cells were plated and transfected  
207 as above. At ~30 hours post-transfection, cells were washed, fixed in 4% formaldehyde,  
208 and permeabilized in 70% ethanol for at least four hours at 4°C. FISH was performed as  
209 previously described (88, 93, 94). Custom Stellaris FISH probes were designed to  
210 recognize NL4-3 HIV-1 *gag-pol* reading frame nucleotides 386-4614 by utilizing Stellaris  
211 RNA FISH Probe Designer (Biosearch Technologies, Inc., Petaluma, CA, USA)  
212 available online at [www.biosearchtech.com/stellarisdesigner](http://www.biosearchtech.com/stellarisdesigner) (version 4.1). The samples  
213 were hybridized with the Gag/GagPol Stellaris RNA Fish Probe set (48 probes) labeled  
214 with CAL Fluor Red 610 dye (Biosearch Technologies, Inc.), following manufacturer's  
215 instructions available online at [www.biosearchtech.com/stellarisprotocols](http://www.biosearchtech.com/stellarisprotocols). Structured

216 illumination microscopy (SIM) was performed on a Nikon N-SIM microscope using a  
217 100x TIRF oil objective lens (NA 1.49). Images were acquired using an Andor iXon Ultra  
218 897 EMCCD (Andor Technology, Belfast, United Kingdom) and Nikon NIS Elements in  
219 3D-SIM mode using the following excitation laser wavelengths (nanometer ranges): 408  
220 (mTagBFP2), 488 (YFP), and 561 (CAL Fluor Red 610). Widefield epifluorescent  
221 microscopy images were deconvolved using NIS Elements. All images were processed  
222 and analyzed using FIJI/ImageJ2 (95). Results were obtained from three biological  
223 replicates as defined as cells plated in IBIDI slides or 24-well dishes transfected on  
224 separate days (i.e. replicate 1 was transfected on a separate day from replicate 2).

225

226

227 **Thin section electron microscopy.** HEK293T cells were cultured in six-well dishes  
228 and transfected as described above. At 48 hours post-transfection, cells were fixed in a  
229 solution of 2.5% glutaraldehyde, 2.0% paraformaldehyde in 0.1M sodium phosphate  
230 buffer (PBS), pH 7.4 for ~2 hours at room temperature. Samples were rinsed five times  
231 for five minutes each in 0.1M PBS. Rinsed cells were post-fixed in 1% osmium  
232 tetroxide, 1% potassium ferrocyanide in PBS for 1 hour at room temperature. Following  
233 osmium tetroxide post-fixation, the samples were rinsed in PBS, as before, and rinsed  
234 three times in distilled water for five minutes to clear phosphates and embedded using  
235 increasing concentrations (10mL A/M, 10mL B, 300 $\mu$ L C, 100 $\mu$ L D components) of  
236 Durcupan ACM resin (Fluka AG, Switzerland) at 60°C. Cells were pelleted and  
237 sectioned using a Leica EM UC6 ultramicrotome with 100nm sections collected on 300  
238 mesh copper thin-bar grids, and contrasted with Reynolds lead citrate and 8% uranyl

239 acetate in 50% ethanol. Sections were observed with a Phillips CM120 transmission  
240 electron microscope, and images were collected with a MegaView III (Olympus-SIS,  
241 Lakewood, CO, USA) side-mounted digital camera. All images were processed and  
242 analyzed using FIJI/ImageJ2 (95).

243

## 244 **RESULTS**

245

246 **Tracking Gag/gRNA interactions in single living cells.** To study Gag/gRNA  
247 interactions both functionally and using fluorescence microscopy, we inserted 24 copies  
248 of the MS2 bacteriophage RNA stem-loop (MS2 stem loops; MSL) recognized by the  
249 MS2 coat protein into the major intron and between the *gag* and *pol* open reading  
250 frames of a full-length HIV-1 NL4-3-based luciferase reporter virus construct (WT-MSL)  
251 (1, 82) (Figure 1). WT-MSL expressed full-length Gag and yielded robust production of  
252 virus-like particles (VLPs) released into the cell media from both HeLa and 293T cells,  
253 albeit in the absence of virion maturation due to abrogation of *gag-pol* expression  
254 (Figures 1B, lane 2). To visualize gRNAs in single cells, MSL-bearing gRNAs were  
255 monitored in HeLa cells engineered to stably express the MS2-YFP protein fused to a  
256 carboxy-terminal nuclear localization signal (NLS) (HeLa.MS2-YFP) (1, 51). In these  
257 cells, low levels of the MS2-YFP protein are sequestered in the nucleus until bound to  
258 an MSL-containing gRNA and exported to the cytoplasm (Figure 1C, compare dRRE  
259 condition to WT or 1ACG) (81).

260 Investigating the role of gRNAs during the process of assembly is confounded by the  
261 gRNA's essential role as the *gag/gag-pol* mRNA (47). Therefore, we generated a

262 gRNA-only construct (1ACG-MSL) bearing a single nucleotide substitution (ATG>ACG)  
263 at the initiator methionine codon of Gag (Figure 1A). To control for cytoplasmic  
264 activities, we deleted the RRE in 1ACG-MSL, resulting in a gRNA incapable of exiting  
265 the nucleus due to the inability of HIV-1 Rev to regulate CRM1-dependent gRNA  
266 nucleocytoplasmic trafficking (dRRE-MSL) (Figure 1A). As expected, neither 1ACG nor  
267 dRRE transcripts generated full-length Gag proteins (Figure 1B, compare lanes 3 and 4  
268 to lane 2), although 1ACG transcripts were translationally-competent, yielding the  
269 synthesis of low levels of a minor Gag isoform (p40) previously shown to result from  
270 initiation at *gag* codon methionine-142 (Figure 1B, lane 3) (96, 97). To supply “gRNA-  
271 minus” Gag *in trans* we employed Gag-fluorescent protein (FP = cyan fluorescent  
272 protein, mTagBFP2, mCherry, *etc.*, depending on the experiment but shown in blue for  
273 consistency) fusion proteins expressed from constructs wherein the *gag* coding region  
274 was sufficiently codon-optimized to achieve protein synthesis in the absence of Rev or  
275 any other viral factors (RevInd GagFP) (63, 84) (Figures 1A and 1B, lane 5).

276 Several RNA viruses utilize their genomes as scaffolds to nucleate virion assembly  
277 events in the cytoplasm (98–101). Whether HIV-1’s gRNA plays a role in the assembly  
278 pathway is unclear, thus we first tested if RevInd GagFP trafficking or assembly  
279 efficiency was affected by the provision of cytoplasmic HIV-1 gRNAs *in trans*. As  
280 expected, expression of WT-MSL and 1ACG-MSL gRNAs yielded translocation of MS2-  
281 YFP from the nucleus to the cytoplasm in >50% of transfected HeLa.MS2-YFP cells at  
282 ~24 hours post-transfection (Figures 1C and 1D). By contrast, dRRE-MSL gRNAs  
283 formed discrete MS2-YFP punctae that were retained in the nucleus in >90% of  
284 transfected cells, consistent with gRNA transcription events in the absence of nuclear

285 export (Figures 1C and 1D). When co-expressed, WT- or 1ACG-gRNAs co-localized  
286 with RevInd GagFP aggregates at the plasma membrane, suggesting Gag/gRNA co-  
287 trafficking to assembly sites (Figure 1C, bottom panels). However, for each of these  
288 conditions, we observed only minor differences to the frequency of cells exhibiting PM-  
289 adjacent RevInd GagFP aggregates (Figure 1C, middle panels, and quantification in  
290 1E). Moreover, RevInd GagFP assembled with similar efficiency when co-expressed  
291 with either 1ACG- or dRRE-gRNAs in a VLP assembly assay in HEK293T cells (Figure  
292 1F). Thus, RevInd GagFP trafficking is largely unaffected by gRNAs co-expressed in the  
293 cytoplasm and accessed in *trans*.

294

295 **HIV-1 gRNA cytoplasmic abundance plays a minor role in GagFP trafficking at the**  
296 **sub-cooperative threshold.** In a second set of experiments, we tested the hypothesis  
297 that gRNA cytoplasmic abundance is more relevant to the assembly pathway at low,  
298 sub-cooperative levels of Gag expression (Figure 2). To avoid the variability of single  
299 cell GagFP expression levels observed due to transfection as for the experiments in  
300 Figure 1, we generated HeLa cells that stably expressed low levels of RevInd Gag-CFP  
301 (HeLa.Gag-CFP cells) and selected a high performance clone wherein RevInd Gag-  
302 CFP was diffuse throughout the cytoplasm but then markedly accumulated in large  
303 punctae at the cell surface in response to HIV-1 infection at 24-36 hours post-infection  
304 (Figure 2A and Video 1).

305 Because these cells lacked MS2-YFP, we tracked Gag-CFP in the presence of  
306 WT-MSL, 1ACG-MSL, and dRRE-MSL gRNAs modified to express MS2-mCherry-NLS  
307 from the native viral promoter (inserted into the *nef* reading frame, Figure 2B). In

308 HeLa.Gag-CFP cells stably expressing WT-MSL/MS2-mCherry-NLS gRNAs, we  
309 observed marked transitions of RevInd Gag-CFP to discrete punctae at the PM of >75%  
310 of cells, similar to infection (Figures 2C, left panels and quantification in 2D). The  
311 gRNA's MS2-mCherry-NLS signal (yellow) co-localized with surface Gag-CFP (cyan)  
312 consistent with Gag/gRNA co-trafficking to the PM and gRNA encapsidation (Figure 2C,  
313 lower left panel). Gag-CFP was also released from cells as VLPs under this condition  
314 (Figure 2F, compare lane 2 to lane 1). Contrary to our hypothesis, the expression of  
315 1ACG-MSL gRNAs did not drive RevInd Gag-CFP to the PM. Instead, we observed  
316 RevInd Gag-CFP as well as cytoplasmic MS2-mCherry-NLS signals coalescing into  
317 large cytoplasmic granules in >50% of cells (Figures 2C, middle panels, quantification in  
318 2E, and Video 2). dRRE-MSL expression had no effect on RevInd Gag-CFP distribution,  
319 as expected (Figures 2C, right panels, 2D, and 2E). Taken together, these data  
320 indicated that a sub-cooperative threshold for Rev-independent Gag assembly cannot  
321 be lowered by an excess abundance of cytoplasmic gRNA in single cells, at least when  
322 provided in *trans*. In fact, the tendency of 1ACG-gRNAs to aggregate Gag-CFP in large  
323 cytoplasmic granules suggests that disproportionately high levels of gRNA in the  
324 cytoplasm may actually be detrimental to Gag trafficking.

325  
326 **Perturbing HIV-1 gRNA subcellular localization potently blocks virus particle**  
327 **production.** The above experiments indicated that altering gRNA cytoplasmic  
328 abundance had little to no effect on Gag subcellular trafficking or assembly competency  
329 when provided in *trans*. Thus, we next tested if gRNA subcellular localization is a  
330 determinant of the assembly pathway. To this end, we modified MS2-YFP fusion

331 proteins to carry subcellular trafficking motifs with the goal of artificially targeting MSL-  
332 bearing gRNAs to specific cellular membranes or the cytoskeleton (Figures 3-6). We  
333 first tested a protein myristoylation signal (MGSSKSKPKD) derived from the proto-  
334 oncogene Src kinase, and generated versions of Src-MS2-YFP that would or would not  
335 accumulate preferentially in association with the nucleus due to the presence or  
336 absence of a carboxy-terminal NLS (Src-MS2-YFP and Src-MS2-YFP-NLS) (Figure 3A).  
337 The Src targeting motif was chosen for these experiments because, similar to Gag's MA  
338 domain, it targets proteins to PI(4,5)P<sub>2</sub> phospholipid moieties at the cytoplasmic face of  
339 the PM (89). Indeed, prior work showed that the assembly of Gag mutants lacking MA is  
340 rescued by the addition of an amino-terminal Src membrane targeting motif (15, 54). As  
341 a control, we employed a previously validated MS2-NXF1 fusion protein that alters  
342 gRNA nucleocytoplasmic transport by biasing it toward the NXF1/NXT1 nuclear export  
343 pathway, in competition with Rev and CRM1 (102, 103). Fluorescence microscopy  
344 confirmed Src-MS2-YFP at the PM in HeLa cells and Src-MS2-YFP-NLS at the nuclear  
345 membrane (Figure 3B).

346 We hypothesized that Src-MS2-YFP proteins would enhance MSL-dependent  
347 gRNA trafficking to the PM, and thus stimulate virus particle assembly. However, we  
348 observed the opposite outcome, with co-expression of Src-MS2-YFP or Src-MS2-YFP-  
349 NLS causing a greater than ten-fold reduction in VLP release efficiency for Gag derived  
350 from our WT-MSL gRNA construct (Figure 3C, compare lanes 3 and 4 to lanes 1 and 2).  
351 Both parental WT gRNAs and RevInd GagFP constructs lacking the MSL cassette were  
352 largely immune to the MS2 targeting proteins (Figures 3D and 3E), confirming that the  
353 effect was specific to MSL-bearing transcripts. Interestingly, the MS2-NXF1 control also



354 affected VLP release efficiency from the WT-MSL construct. However, this effect was  
355 associated with a marked increase to cell-associated Gag, likely reflecting enhanced  
356 gRNA nuclear export and/or Gag synthesis through linkage to the NXF1/NXT1 pathway  
357 (Figure 3C, lane 5).

358

359 **Src-MS2-YFP proteins induce a gRNA-specific block to Gag trafficking in *cis*.** To

360 explore the mechanism underpinning the Src-MS2-YFP-linked assembly block, we first

361 tracked GagFP molecules expressed from previously validated Rev-dependent GagFP-

362 MSL-RRE surrogate gRNA plasmids (Figure 4A) (81) in the presence or absence of

363 Src-MS2-YFP targeting proteins. Similar to WT-MSL gRNAs, GagFP VLP release was

364 almost completely inhibited by Src-MS2-YFP or Src-MS2-YFP-NLS expression (Figure

365 4B, compare lanes 3 and 4 to 1 and 2). Moreover, GagFP was less frequently detected

366 at PM punctae under these conditions, consistent with a defect to either Gag

367 intracellular trafficking or Gag cytoplasmic abundance (Figure 4C and quantification in

368 4D). To distinguish between these two possible explanations, we transfected HEK293T

369 cells with Rev and decreasing amounts of GagFP-MSL-RRE, or a constant amount of

370 Rev and GagFP-MSL-RRE plus increasing amounts of the Src-MS2-YFP construct

371 (Figure 4E). Increasing levels of Src-MS2-YFP lowered the amount of GagFP in VLPs

372 without notable changes to the levels of cell-associated GagFP, a result most consistent

373 with a block to virus particle assembly or release from the cell. We also tested if Src-

374 MS2-YFP proteins could inhibit VLP production in *trans* by co-transfecting RevInd

375 GagFP with 1ACG genomes either lacking or bearing the MSL cassette, and also in the

376 presence or absence of either control MS2-YFP-NLS or inhibitory Src-MS2-YFP

377 proteins. Src-MS2-YFP did not inhibit assembly by RevInd GagFP under these  
378 conditions (Figure 4F, compare lanes 3 and 6 to the controls in lanes 7 and 8), thus  
379 confirming that the Src-MS2-YFP-induced, gRNA-dependent assembly inhibition occurs  
380 only in *cis*.

381

382 **Re-targeting gRNAs competent for Gag synthesis to non-PM membranes or F-**  
383 **actin markedly affects Gag trafficking and assembly competency.** Because the  
384 MS2-YFP proteins were proxies for MSL-bearing RNAs, we confirmed the subcellular  
385 localization of native gRNAs using single molecule fluorescence *in situ* hybridization  
386 (smFISH) in conjunction with superresolution structured illumination microscopy (SIM).  
387 In these experiments, we transfected HeLa cells with Rev-dependent GagFP-MSL-RRE  
388 and MS2-YFP fusion proteins with or without Rev, fixed cells at ~30 hours post-  
389 transfection, and performed smFISH using a *gag/gag-pol*-specific DNA probe set  
390 (Figure 5A). HeLa cells transfected with MS2-YFP-NLS and GagFP-MSL-RRE in the  
391 absence of Rev exhibited marked co-localization between MS2-YFP-NLS and the gRNA  
392 FISH signal in the nucleus, with no apparent GagFP expression, as expected (Figure  
393 5A, NLS no Rev condition, and Video 3). When Rev was co-expressed, both the MS2-  
394 YFP-NLS and gRNA FISH signals were now readily detected in the cytoplasm as well  
395 as co-localizing with GagFP at PM-adjacent punctae, (Figure 5A, NLS+Rev condition,  
396 and Video 4). These experiments confirmed that the MS2-YFP signals tracked in  
397 Figures 1-4 were indeed representative of actual gRNA trafficking and that our system  
398 was Rev-responsive.

399 As expected, Src-MS2-YFP also co-localized with the gRNA smFISH signal,  
400 although for this condition Src-MS2-YFP clearly triggered a massive relocalization of  
401 gRNAs from a diffuse cytoplasmic distribution to intracellular membranes including,  
402 unexpectedly, the nuclear envelope (Figure 5A, Src+Rev condition, and Video 5).  
403 Remarkably, we also observed notable accumulations of GagFP at or near these  
404 intracellular sites, suggesting VLP assembly and/or aberrant Gag aggregation at non-  
405 native subcellular locations (Figure 5A, compare blue panels for NLS+Rev and Src+Rev  
406 conditions). Consistent with this hypothesis, thin section electron microscopy on  
407 HEK293T cells transfected similarly to express the same MS2-YFP targeting proteins  
408 with WT-MSL gRNAs revealed a high frequency of intracellular VLP assembly events  
409 for the Src-MS2-YFP condition (Figure 5B and quantification in 5C). Thus, gRNA-  
410 directed Gag mistargeting was likely to explain the bulk of the virus particle release  
411 defect described in Figures 3 and 4.

412 Because cortical actin has also been implicated in HIV-1 trafficking/assembly  
413 (104–111), we also tested the effects of targeting gRNAs to actin by fusing MS2-YFP to  
414 the Lifeact peptide that binds to F-actin bundles (112). Interestingly, Lifeact-MS2-YFP  
415 also reduced virus particle production specifically from MSL-bearing gRNAs but to a  
416 lesser extent than did the Src-MS2-YFP construct (Figure 5D, compare lanes 5 and 6 to  
417 1 through 4). Both gRNAs and GagFP were observed to co-aggregate with Lifeact-MS2-  
418 YFP at or near actin filaments (Figure 5A, Lifeact+Rev condition, and Video 6) and  
419 electron micrographs revealed an increase to partial or incomplete VLP budding events  
420 (Figure 5B and quantification in 5C).

421 Finally, we tested the effects of an HIV-1 MA-MS2-YFP targeting protein fusing a  
422 codon optimized HIV-1 MA domain to the amino-terminus of MS2-YFP. We  
423 hypothesized that this configuration would drive MSL-gRNAs to accumulate at virally  
424 “appropriate” PM assembly sites (Figure 6A). However, similar to both the Src- and  
425 Lifeact-MS2-YFP conditions, MA-MS2-YFP had a potent inhibitory effect on assembly  
426 (Figure 6B). GagFP in this condition was successfully trafficked to the PM but was  
427 frequently observed forming striking, “worm-like” extensions at the cell surface (Figure  
428 6C and Video 7). These data confirmed that re-directing gRNAs to specific subcellular  
429 localizations also markedly affects Gag trafficking and can even negatively impact the  
430 integrity of the assembly event.

431

432 **The gRNA-linked assembly arrest is specific to Gag derived from Rev/RRE-**  
433 **dependent mRNAs.** A remaining conundrum for this study was the fact that Gag is  
434 sufficient to drive virus particle assembly at the PM even in the absence of gRNA  
435 binding (13, 54, 18). Thus, how can the gRNA be affecting Gag trafficking? One  
436 possible explanation for our observations was that, under native conditions, a  
437 determinant of the assembly pathway is localized Gag/Gag-Pol translation at the site of  
438 gRNA tethering. Should this hypothesis be correct, both native, Rev-dependent gRNAs  
439 and our synthetic RevInd GagFP transcripts modified to carry an MSL cassette (Figure  
440 7A) should be similarly affected by MS2-based RNA tethering. Contrary to this  
441 hypothesis, both Src-MS2-YFP and Lifeact-MS2-YFP actually enhanced VLP  
442 production from RevInd Gag-CFP-MSL transcripts (compare Figure 7C to 7B). We also  
443 observed that Src-MS-YFP had little to no negative effect on Gag derived from intron-

444 retaining gRNA constructs rendered Rev-independent by replacing the RRE with four  
445 copies of the constitutive transport element (4xCTE) derived from the betaretrovirus  
446 Mason-Pfizer monkey virus (Figure 7D). This transcript is exported to the cytoplasm by  
447 NXF1/NXT1 instead of CRM1 (76, 87). These results thus implicated the RRE and/or  
448 Rev as core determinants of the native Gag/gRNA assembly pathway. Indeed, RevInd  
449 Gag-CFP-MSL constructs modified to also carry the RRE became sensitive to Src-MS2-  
450 YFP co-expression, but only when co-expressed with Rev (Figure 7E).

451  
452 **Trans-dominant Gag mutants specifically reduce the assembly of Gag derived**  
453 **from Rev/RRE-dependent transcripts.** The above experiments revealed an  
454 unexpected link between gRNA nuclear history (*i.e.*, nuclear export via the  
455 RRE/Rev/CRM1 pathway), gRNA distribution in the cytoplasm, and Gag assembly  
456 competency. Because spatial perturbations of gRNA trafficking could represent a yet  
457 untapped antiviral strategy, we tested the effects of disrupting native HIV-1 gRNAs not  
458 bearing the MSL cassette by overexpressing Gag proteins competent for gRNA binding  
459 (due to an intact NC domain) but mutated to no longer traffic to the PM (Figure 8). To  
460 this end, we co-transfected HEK293T cells to express either Rev-independent synthetic  
461 Gag/Gag-Pol transcripts (RevInd Gag-Pol) or the full-length, parental WT HIV gRNA in  
462 the presence or absence of each of the following versions of RevInd Gag-CFP:  
463 assembly competent RevInd Gag-CFP (84), non-myristoylated RevInd Gag-G2A-CFP  
464 (113), MA-deficient RevInd Gag-p40-CFP (96), and NC deficient RevInd Gag-dNCzip-  
465 CFP (15). None of these RevInd Gag-CFP mutants notably affected expression and  
466 assembly of Gag derived from the RevInd Gag-Pol construct (Figure 8A). However, VLP

467 assembly for Gag derived from the parental WT construct was reduced for all of the  
468 assembly-defective conditions, provided that the *trans*-acting Gag protein encoded an  
469 intact NC domain (Figure 8B, compare lanes 4-5 to lane 6). The inhibitory assembly  
470 effects were limited to Gag encoded from a WT gRNA (and not the synthetic, RevInd  
471 Gag/Gag-Pol) and were not observed when WT HIV was co-transfected with RevInd  
472 dNCzip-CFP. Assembly inhibition was native gRNA-dependent and likely to involve  
473 disruption of *cis* interactions between gRNA and its protein product, Gag. Thus, there  
474 appear to be strong links between gRNA nuclear history and the susceptibility of Gag to  
475 *trans*-acting inhibitory elements.

476

## 477 **DISCUSSION**

478

479 For retroviruses, gRNA nucleocytoplasmic transport is a highly ordered process  
480 ensuring robust late gene expression and efficient genome encapsidation during virion  
481 assembly. Herein we provide, to our knowledge, the first direct evidence that gRNA  
482 subcellular distribution represents a core determinant of HIV-1's assembly pathway.  
483 Altering the cytoplasmic abundance of non-coding, 1ACG-gRNAs had little to no effect  
484 on Gag-FP trafficking or assembly in a *trans* context (Figures 1 and 2). By contrast,  
485 artificially tethering gRNAs to cellular membranes or the actin cytoskeleton markedly  
486 affected Gag trafficking in *cis* and potently reduced virus particle release (Figures 3  
487 through 6). MS2-retargeted gRNAs (detected by FISH) and Gag coalesced together at  
488 aberrant sites within the cell thus indicating that gRNAs encode one or more signaling  
489 activities relevant to the assembly pathway. Unexpectedly, we mapped this signal to the

490 Rev/RRE nuclear export module that regulates CRM1-dependent gRNA nuclear export  
491 (Figure 7). That Gag derived from Rev-independent mRNAs was largely immune to the  
492 effects of RNA tethering (Figures 7C and 7D) or *trans*-dominant Gag proteins (Figure 8)  
493 supports a model wherein specialized links between HIV-1 Rev function and gRNA  
494 cytoplasmic trafficking regulate Gag's assembly potential (Figure 9).

495 We initially hypothesized that increasing the net abundance of PM-proximal  
496 gRNAs would stimulate virus particle assembly should gRNAs encode one or more  
497 signals relevant to the nucleation of the assembly event. However, overexpressing  
498 "Gag-minus" 1ACG-gRNAs in *trans* had little to no effect on assembly either at high  
499 (Figure 1) or low (Figure 2) levels of GagFP. In fact, 1ACG-gRNAs arrested GagFP in  
500 cytoplasmic granules in our stable "low" GagFP cell line, suggesting that suboptimal  
501 Gag-gRNA stoichiometry is detrimental to the formation and transit of gRNP trafficking  
502 complexes. Efforts to bias gRNP trafficking to the PM using our MS2-based RNA  
503 tethering strategy were also not beneficial to assembly, but instead potently inhibited  
504 particle production for Gag derived from gRNAs or Rev-dependent *gag-pol* mRNAs  
505 (Figures 3-7). Based on these observations we reason that, under native conditions,  
506 HIV-1 must maintain a careful balance of Gag-gRNA interactions (and likely interactions  
507 with host factors) that prevent gRNP aggregation or accumulation in subcellular  
508 locations other than preferred sites of assembly (i.e., the "bad neighborhood" model,  
509 see Figure 9).

510 Single-molecule FISH coupled to superresolution microscopy in HeLa cells  
511 confirmed that Src-MS2-YFP proteins markedly altered MSL-gRNA distribution away  
512 from a "typical" diffusive pattern in the cytosol to accumulate preferentially at

513 membranes (Figure 5A). However, we were surprised to observe that gRNAs and Gag  
514 did not accumulate at the PM under these conditions, but instead co-localized at or near  
515 the nuclear membrane or in association with vesicles distributed throughout the  
516 cytoplasm. This aberrant distribution and observations of intracellular assembly events  
517 (Figure 5B) likely explain the profound block to VLP release. Lifeact-MS2-YFP and MA-  
518 MS2-YFP also markedly reduced the efficiency of virus particle production in the context  
519 of MSL-gRNAs but apparently through alternative mechanisms (Figures 5 and 6).  
520 Lifeact-MS2-YFP caused a re-distribution of gRNAs and Gag into linear arrays defined  
521 by F-actin filaments at or near the PM (Figure 5A and Video 6), with an increase to the  
522 occurrence of partially budded particles (Figures 5B and 5C) reminiscent of a late  
523 budding defect (32, 114). MA-MS2-YFP's effects were more dramatic, causing GagFP  
524 to form striking, worm-like aggregates at the PM (Figure 6) resembling previously  
525 reported defects to the formation of the immature capsid lattice (115–119). In sum,  
526 these results demonstrate unambiguously that physically perturbing HIV-1 gRNA  
527 cytoplasmic trafficking can have profound effects on the assembly pathway independent  
528 of effects on Gag synthesis. Moreover, we it is intriguing that each MS2 targeting  
529 protein affected a distinct phase of pathway; site of assembly (S-MS2-YFP), late stage  
530 budding (Lifeact-MS2-YFP), or capsid assembly (MA-MS2-YFP).

531       Regarding the mechanistic link between gRNA subcellular distribution and the  
532 assembly pathway, we found that S-MS2-YFP's inhibitory activity (and to a lesser  
533 extent, that of Lifeact-MS2-YFP) was specific to gRNAs and surrogate *gag/gag-pol*  
534 mRNAs encoding the RRE and expressed in the presence of Rev (Figure 7). Thus,  
535 Gag's vulnerability to this mode of inhibition is tied to gRNA nuclear history. We cannot



536 yet fully explain the molecular basis for Rev/RRE specificity. Several genetic studies  
537 indicate that Rev-dependent and Rev-independent mRNAs are differentially regulated in  
538 the cytoplasm (35, 81, 87, 120–126). Moreover, we and others have previously shown  
539 that gRNA nuclear history can affect Gag subcellular trafficking and/or assembly  
540 efficiency (47, 69, 75, 87, 127–129). In this context, we recently showed using live cell  
541 imaging that HIV-1 gRNAs or heterologous mRNAs modified to bear the RRE and  
542 expressed in the presence of Rev exhibit unique, CRM1-driven “burst” nuclear export  
543 events wherein transcripts flood the cytoplasm *en masse* and prior to the onset of  
544 protein synthesis, thus yielding the diffusive distribution gRNAs in the cytoplasm shown  
545 in Figure 1C (81). Thus, unique spatiotemporal features of the Rev-regulated burst (*e.g.*,  
546 punctuated, rapid increases to free Gag/gRNP abundance in the cytoplasm, or diffusion  
547 in itself) likely influence core aspects of the assembly pathway.

548       Indeed, large gRNP complexes trafficking through the cytoplasm prior to  
549 utilization draw parallels with cellular mRNA molecules that are translated locally (2–4).  
550 We suggest that perturbations to the ability of gRNAs to freely diffuse through a dense  
551 cytoplasmic fluid may have negative consequences for localized translation and  
552 subsequent virion assembly. The nuclear coating/coding of gRNAs with cellular factors  
553 may also influence the size, hydrophobicity, and fluid phase of HIV-1 gRNP complexes.  
554 Several host post-transcriptional regulatory factors are implicated in the regulation of  
555 HIV-1 gRNA trafficking and/or translation (47–49, 130). One or more co-factors tied to  
556 the Rev/RRE/CRM1 transport module may represent a “missing link” between Rev  
557 function and Gag assembly competency. In this context, it is worth noting that Kutluay *et*

558 *a/*. recently provided evidence from CLIP-seq analysis for a direct interaction between  
559 Gag and the RRE of as yet unknown functional relevance (39).

560 Finally, it remains a conundrum that Gag derived from Rev-independent mRNAs  
561 (e.g., RevInd GagFP or Gag derived from 4xCTE-dependent mRNAs) is largely  
562 resistant to MS2-tethering or trans-dominant Gag proteins. However, this dichotomy  
563 emphasizes specific vulnerabilities to the Rev/RRE pathway that may be relevant to the  
564 development of novel anti-HIV strategies. To date, there are no FDA-approved antiviral  
565 approaches that perturb HIV-1 gene expression or the stages upstream of immature  
566 virus particle assembly, although several strategies have been pursued including  
567 disruption of Tat or Rev function, virus-specific miRNAs, and trans-dominant proteins  
568 [reviewed in (131)]. Our results suggest that strategies to successfully disrupt viral  
569 mRNA subcellular distribution or fluid phase transitions using small molecule inhibitors  
570 or alternative strategies (e.g., provision of *trans*-acting synthetic “restriction” factors via  
571 gene therapy) merit further exploration.

572

### 573 **ACKNOWLEDGEMENTS**

574 This study was supported by funding from the National Institutes for Health / National  
575 Institute of Allergy and Infectious Diseases (RO1AI110221A1) and the Greater  
576 Milwaukee Foundation’s Shaw Scientist Program to N.M.S.. J.T.B. is a trainee of the  
577 National Science Foundation Graduate Research Fellow Program (grant DGE-  
578 1256259). Any opinions, findings, and conclusions or recommendations expressed in  
579 this material are those of the authors and do not necessarily reflect the views of the  
580 National Science Foundation. We gratefully acknowledge Randall Massey and the

581 University of Wisconsin SMPH Electron Microscopy Facility for assistance with  
582 processing and imaging EM. We gratefully acknowledge Elle Kielar Grevstad and the  
583 University of Wisconsin Biochemistry Optical Core for assistance with structured  
584 illumination microscopy. The following reagents were obtained through the NIH AIDS  
585 Reagent Program, Division of AIDS, NIAID, NIH: HIV-1 p24 Hybridoma (183-H12-5C)  
586 (from Dr. Bruce Chesebro) and Saquinavir.  
587

## 588 **FIGURE LEGENDS**

589 **Figure 1. Tracking Gag/gRNA interactions in single living cells.** (A) Cartoon  
590 depiction of gRNAs used in these studies.  $\Psi$  = Psi packaging signal. MSL = 24 copies of  
591 MS2 RNA stem loop. RRE = Rev-response element. *Tat* and *rev* are gene-regulatory  
592 elements made from multiply-spliced mRNAs. *Vif* and *vpu* are immune modulatory  
593 genes made from singly-spliced mRNAs. (B) HEK293T cells were transfected with  
594 2000ng HIV-1 plasmids encoding gRNAs depicted in A. VLPs and cell lysates were  
595 collected 48 hours post-transfection, resolved by SDS-PAGE, and immunoblotted for  
596 Gag and HSP90 as a loading control. (C) Widefield deconvolution microscopy images of  
597 HeLa.MS2-YFP cells transfected with 100ng RevInd GagFP and 900ng HIV constructs,  
598 fixed ~30 hours post-transfection, and imaged. Single Z-plane images are shown. Scale  
599 bars represent 10 microns in full images, 2 microns in regions of interest (ROI). Dashed  
600 white lines show the relative position of cell nuclei. White box outlines the ROI. Red  
601 arrows indicate sites where RevInd GagFP has accumulated in PM-adjacent punctae.  
602 (D) Quantification of MS2-YFP localization phenotypes. Bar graphs show percent of  
603 cells with nuclear, cytoplasmic, or both distributions of gRNA for each transfection  
604 condition. (E) Quantification of GagFP distribution phenotypes. Bar graphs show  
605 percent of cells with diffuse or PM-adjacent punctae Gag localization in each  
606 transfection condition. (D & E) Error bars represent standard deviation from the mean  
607 for at least four independent experiments quantifying at least 100 cells per condition. (F)  
608 HEK293T cells were co-transfected with 500ng RevInd GagFP and 1500ng of HIV  
609 gRNA constructs as indicated or an empty vector control (pBluescript) and  
610 immunoblotted as in 1A. Bar graphs show fold change in Gag release factor relative to

611 empty vector condition. Release factor is calculated by Gag band intensities in VLPs  
612 divided by lysates normalized to HSP90 (N=4).

613

614 **Figure 2. HIV-1 gRNA cytoplasmic abundance plays a minor role in GagFP**

615 **trafficking at the sub-cooperative threshold.** (A) Widefield deconvolution microscopy

616 images from live cell imaging experiments of HeLa.Gag-CFP cells infected with WT

617 NL4-3 E-R- virions. This virus expresses mCherry as a reporter for successful infection.

618 Multi-channel images were acquired once per hour for up to 48 hours beginning at ~1

619 hours post-infection. Scale bars represent 10 microns. Red arrows indicate sites where

620 stably expressed RevInd Gag-CFP has accumulated in PM-adjacent punctae. (B)

621 Example of WT-MSL gRNA used in experiments below. These gRNAs are identical to

622 those depicted in Figure 1A with the addition of MS2-mCherry-NLS as a reporter and

623 gRNA-tagging protein expressed from the viral *nef* gene position. (C) Widefield

624 deconvolution microscopy images of stable HeLa.Gag-CFP cells transfected with

625 1000ng HIV gRNA constructs, fixed ~30 hours post-transfection, and imaged. Scale

626 bars represent 10 microns in full images, 2 microns in ROI. Dashed white lines show the

627 relative position of cell nuclei. White box outlines the ROI. Red arrows indicate sites

628 where stably expressed Gag has accumulated: in PM-adjacent punctae for WT-MSL

629 and in the cytoplasm for 1ACG-MSL and dRRE-MSL. Dashed red line in ROI represents

630 edge of cell. (D & E) Quantification of Gag-CFP distribution phenotypes from live cell

631 imaging experiments performed similar to Figure 2A. HeLa.Gag-CFP cells were

632 transfected with 333ng of gRNA constructs (WT-MSL, 1ACG-MSL, and dRRE-MSL also

633 encoding MS2-mCherry-NLS as a reporter and gRNA tagging protein). (D) Bar graphs

634 show percent of cells with diffuse or PM-adjacent punctae Gag localization. (E) Bar  
635 graph shows percent of cells with diffuse, granules, or PM-adjacent punctae Gag  
636 localization. (D & E) Error bars represent standard deviation from the mean. At least 30  
637 cells were quantified per transfection condition per experiment (N=3). (F)  
638 HEK293T.Gag-CFP cells were transfected with 2000ng of HIV gRNA constructs as  
639 indicated or an empty vector control (pBluescript) and immunoblotted for Gag and  
640 HSP90. Bar graphs show fold change in Gag release factor relative to empty vector  
641 condition (N=3). The asterisk (\*) indicates stable GagFP release factor for WT-MSL  
642 condition is significantly different from empty vector condition (Two-tailed Student's t-  
643 test, p=0.0006).

644

645 **Figure 3. Perturbing HIV-1 gRNA subcellular localization potently blocks virus**  
646 **particle production.** (A) Cartoon depiction of MS2-YFP targeting protein constructs  
647 used in these studies. Short name used in subsequent figures is underlined. Amino acid  
648 targeting motif is shown at their relative (amino- or carboxy-terminal) position. (B)  
649 Widefield deconvolution microscopy images of HeLa cells transfected with 333ng MS2-  
650 YFP targeting constructs, fixed ~30 hours post-transfection, and imaged. Scale bars  
651 represent 10 microns. Dashed white lines show the relative position of cell nuclei.  
652 Dashed cyan lines show the edge of cell. (C) HEK293T cells were transfected with  
653 1000ng MS2-YFP targeting constructs as indicated and 1000ng of WT-MSL and  
654 immunoblotted for Gag and HSP90. Bar graphs show release factor relative to Free  
655 MS2-YFP. Error bars represent standard deviation from the mean of three independent  
656 experiments. The asterisks (\*) indicate Pr55 Gag release factor is significantly different

657 for comparisons indicated by black bars (two-tailed Student's t-test,  $p=0.023$  Src &  
658 0.015 Src+NLS). (D) HEK293T cells were transfected with 1000ng MS2-YFP targeting  
659 constructs as indicated and 1000ng of WT NL4-3 E-R- and immunoblotted for Gag and  
660 HSP90. Cells were treated with the HIV-1 protease inhibitor saquinavir to prevent Pr55  
661 Gag proteolytic processing and aid quantification of Gag expression and release. Bar  
662 graphs show release factor relative to Free MS2-YFP. Error bars represent standard  
663 deviation from the mean of three independent experiments. No conditions were  
664 significantly different. (E) HEK293T cells were transfected with 1000ng MS2-YFP  
665 targeting constructs as indicated and 1000ng of RevInd GagFP immunoblotted for Gag  
666 and HSP90. Bar graphs show release factor relative to Free MS2-YFP. Error bars  
667 represent standard deviation from the mean of three independent experiments.

668

669 **Figure 4. Src-MS2-YFP proteins induce a gRNA-specific block to Gag trafficking**  
670 **in cis.** (A) Cartoon depiction of subgenomic HIV-1 GagFP-MSL-RRE construct used.  
671 Splice donor (SD) and splice acceptor (SA) are shown to emphasize that the viral *gagfp*  
672 mRNA (surrogate gRNA) retains an intron. (B) HEK293T cells were transfected with  
673 1000ng MS2-YFP targeting constructs as indicated, 900ng of GagFP-MSL-RRE, and  
674 100ng pRev and immunoblotted for Gag and HSP90. Bar graphs show release factor  
675 relative to Free MS2-YFP. Error bars represent standard deviation from the mean of  
676 three independent experiments. The asterisks (\*) indicate Pr55 Gag release factor is  
677 significantly different for comparisons indicated by black bars (two-tailed Student's t-  
678 test,  $p=0.03$ ). (C) Widefield deconvolution microscopy images of HeLa cells transfected  
679 with 100ng MS2-YFP targeting constructs, 800ng subgenomic GagFP-MSL-RRE, and

680 pRev, fixed ~30 hours post-transfection, and imaged. Scale bars represent 10 microns  
681 in full images, in regions of interest (ROI). Dashed white lines show the relative position  
682 of cell nuclei. White box outlines the ROI. Red arrows indicate sites where GagFP has  
683 accumulated. (D) Quantification of GagFP localization phenotypes. Bar graphs show  
684 percent of cells with vesicular, diffuse cytoplasmic, or PM-adjacent/punctate for each  
685 transfection condition. Error bars represent standard deviation from the mean for three  
686 independent experiments quantifying at least 100 cells per condition. (E) HEK293T  
687 were transfected with decreasing amounts of GagFP-MSL-RRE (1500/1000/500ng) plus  
688 200ng Rev and empty vector as filler up to 2 $\mu$ g total DNA in lanes 1-3. Cells were  
689 transfected with 1500ng GagFP-MSL-RRE, plus 200ng Rev, empty vector as filler, and  
690 increasing amounts (100/200/300ng) of Src-MS2-YFP and immunoblotted for Gag and  
691 HSP90. Bar graphs show release factor relative to lane 1. Error bars represent standard  
692 deviation from the mean of three independent experiments. (F) HEK293T cells were  
693 transfected with 500ng RevInd Gag-CFP, 100ng MS2-YFP targeting construct as  
694 indicated, and 1400ng empty vector, 1ACG (no MSL), or 1ACG-MSL in lanes 1-6.  
695 Lanes 7-8 were transfected with 1400ng GagFP-MSL-RRE, 100ng MS2-YFP targeting  
696 construct as indicated, 200ng Rev, and 300ng empty vector immunoblotted for Gag and  
697 HSP90.

698

699

700 **Figure 5. Gag accumulates at sites of mislocalized HIV-1 gRNA.** (A) HeLa cells  
701 were transfected with 800ng GagFP-MSL-RRE, 100ng MS2-YFP targeting constructs  
702 as indicated, and 100ng Rev or empty vector as indicated. Cells were fixed at ~30 hours



703 post-transfection, subjected to FISH staining, and multi-Z stack images acquired by  
704 structured-illumination microscopy (SIM) using a 100x (NA 1.49) TIRF oil objective.  
705 Single Z-plane images are shown with scale bars representing 5 microns. White arrows  
706 indicate points of interest highlighting colocalization. Nucleus = “nuc”, cytoplasm =  
707 “cyto”. (B) HEK293T cells were transfected with 1800ng WT-MSL and 200ng MS2-YFP  
708 targeting constructs as indicated for EM. Samples were prepared and images were  
709 acquired as described in Materials and Methods. Red arrows indicate representative  
710 particle events for budding (NLS), intracellular (Src), and incomplete (Lifeact). (C)  
711 Quantification of particles with budding phenotypes. Bar graph shows percent of  
712 assembly events exhibiting intracellular, incomplete, or budding phenotype. Errors bars  
713 represent standard deviation from the mean of 10 cells imaged. At least 100 budding  
714 events were quantified per transfection condition. (D) HEK293T cells were transfected  
715 with 100ng MS2-YFP targeting constructs as indicated and either 1700ng RevInd  
716 GagFP with empty vector OR 1700ng of GagFP-MSL-RRE with 200ng pRev and  
717 immunoblotted for Gag and HSP90. Bar graphs show release factor relative to MS2-  
718 YFP-NLS condition for each Gag type (RevInd GagFP or GagFP-MSL-RRE). Error bars  
719 represent standard deviation from the mean of three independent experiments. The  
720 asterisks (\*) indicate GagFP release factor is significantly different for comparisons  
721 indicated by black bars (two-tailed Student’s t-test,  $p=0.0001$ ).

722

723 **Figure 6. Re-directing HIV-1 gRNAs using MA-MS2 negatively impact Gag**  
724 **assembly and release competency.** (A) Cartoon depiction of MA-MS2-YFP targeting  
725 protein construct. Widefield deconvolution microscopy image of HeLa cell transfected

726 with 333ng MS2-YFP targeting constructs, fixed ~30 hours post-transfection, and  
727 imaged. Scale bar represent 10 microns. The basal surface (adjacent to the coverslip) is  
728 shown. (B) HEK293T cells were transfected with 100ng MA-MS2-YFP targeting  
729 construct and 1700ng of GagFP-MSL-RRE with 200ng pRev immunoblotted for Gag  
730 and HSP90. Numbers show release factor relative to MS2-YFP-NLS condition from a  
731 single experiment. (C) Widefield deconvolution microscopy images of HeLa cells  
732 transfected with 100ng MA-MS2-YFP, 800ng GagFP-MSL-RRE and 100ng pRev, fixed  
733 ~30 hours post-transfection, subjected to smFISH staining, and imaged. Scale bars  
734 represent 10 microns in full images, 2 microns in regions of interest (ROI). The basal  
735 surface (adjacent to the coverslip) is shown. White box outlines the ROI. White arrows  
736 indicate sites where GagFP has accumulated in worm-like tubules.

737

738 **Figure 7. The gRNA-linked assembly arrest is specific to Gag derived from**  
739 **Rev/RRE-dependent mRNAs.** (A) Cartoon depiction of constructs used in these  
740 studies. 4xCTE = four copies of the constitutive transport element from Mason-Pfizer  
741 monkey virus. (B-D) HEK293T cells were transfected with 100ng MS2-YFP targeting  
742 constructs as indicated and 1700ng of GagFP-MSL-RRE and 200ng pRev (B), 1700ng  
743 GagFP-MSL-CTE and 200ng empty vector (C), or 1700ng RevInd GagFP-MSL and  
744 200ng empty vector (D). VLPs and cell lysates were immunoblotted for Gag and  
745 HSP90. Bar graphs show release factor relative to MS2-YFP-NLS. Error bars represent  
746 standard deviation from the mean of three independent experiments. The asterisks (\*)  
747 indicate GagFP release factor is significantly different for comparisons indicated by  
748 black bars (two-tailed Student's t-test, p=0.018 Src & 0.047 Lifeact). (E) HEK293T cells

749 were transfected with 100ng MS2-YFP targeting constructs as indicated, 1700ng of  
750 RevInd GagFP-MSL-RRE, and either 200ng empty vector or pRev and immunoblotted  
751 for Gag and HSP90. Bar graphs show release factor relative to Free MS2-YFP. Error  
752 bars represent standard deviation from the mean of three independent experiments.  
753 The asterisks (\*) indicate GagFP release factor is significantly different for comparisons  
754 indicated by black bars (two-tailed Student's t-test,  $p=0.007$ ).

755

756 **Figure 8. Trans-dominant Gag mutants specifically reduce the assembly of Gag**  
757 **derived from Rev/RRE-dependent transcripts.** HEK293T cells were transfected with  
758 1000ng synthetic RevInd Gag/Gag-Pol construct (A) or WT NL4-3 E-R- (B) and 1000ng  
759 of empty vector, RevInd GagFP, G2A GagFP, p40 GagFP, or dNCzip GagFP. Cells  
760 were treated with the HIV-1 protease inhibitor saquinavir to prevent Pr55 Gag  
761 proteolytic processing and aid quantification of Gag expression and release. VLPs and  
762 cell lysates were immunoblotted for Gag and HSP90. Bar graphs show Pr55 Gag  
763 release factor relative to empty vector. Error bars represent standard deviation from the  
764 mean of three independent experiments.

765

766 **Figure 9. Right place, right time model for HIV-1 gRNA trafficking, Gag translation,**  
767 **and virion assembly.** HIV-1 gRNA (red wiggly line) are exported from the nucleus via  
768 the RRE/Rev/CRM1 pathway. Once in the cytoplasm, the HIV-1 gRNA are translated  
769 (purple ribosomes) to yield some amount of the Gag polyprotein. We suggest that these  
770 HIV-1 gRNAs freely diffuse toward the PM where gRNA dimerization, high-order Gag  
771 multimerization, and virion assembly occur. If these gRNAs are redirected to different

772 subcellular locales (“Bad Neighborhoods”) such as intracellular vesicles (tan circles) or  
773 actin filaments (black chalk lines), Gag trafficking is similarly redirected and virion  
774 assembly is subsequently inhibited. In our system, using Src-MS2-YFP and Lifeact-  
775 MS2-YFP we have observed this redirection and inhibition that occurs via *cis*  
776 interactions between Gag and gRNA and is RRE/Rev-dependent. It is possible that  
777 gRNAs exported through the CRM1 pathway are marked, restructured, or coated by  
778 some as of yet unknown “missing link” indicated here by pink factor X.

779

780 **Video 1. HIV-1 infection induces accumulation of stably-expressed GagFP into**  
781 **assembly sites at the PM.** Live cell imaging of HeLa.Gag-CFP (cyan) cells infected  
782 with WT NL4-3 E-R- virions expressing an mCherry (red) as a reporter for successful  
783 infection. Images were acquired once per hour and are shown here at 4 frames per  
784 second. Scale bar represents 10 microns. White arrows indicate sites where stably  
785 expressed RevInd Gag-CFP has accumulated in PM-adjacent punctae.

786

787 **Video 2. HIV-1 gRNA induces accumulation of stably-expressed GagFP into**  
788 **cytoplasmic granules.** Live cell imaging of HeLa.Gag-CFP (cyan) cells transfected  
789 with 1ACG-MSL/MS2-mCherry (yellow). Images were acquired once per hour and are  
790 shown here at 4 frames per second. Scale bar represents 10 microns. White arrows  
791 indicate sites where stably expressed RevInd Gag-CFP and MS2-mCherry-tagged  
792 gRNA have accumulated in cytoplasmic granules.

793

794 **Video 3. Three-dimensional view of MS2-YFP-NLS and smFISH tagged HIV-1**  
795 **gRNA.** SIM image reconstructed in 3D using FIJI/ImageJ2. Scale bar represents 5  
796 microns. MS2-YFP (green) and gRNA FISH (red) are sequestered in the nucleus in the  
797 absence of the Rev protein. White arrow indicates edge of nucleus (nuclear envelope).

798

799 **Video 4. Three-dimensional view of MS2-YFP-NLS, smFISH tagged HIV-1 gRNA,**  
800 **and HIV-1 Gag.** SIM image reconstructed in 3D using FIJI/ImageJ2. Scale bar  
801 represents 5 microns. MS2-YFP (green) and gRNA FISH (red) colocalize in the  
802 cytoplasm and at the PM with Gag (blue). White arrows indicate colocalized MS2-YFP,  
803 gRNA, and Gag punctae at PM.

804

805 **Video 5. Three-dimensional view of Src-MS2-YFP, smFISH tagged HIV-1 gRNA,**  
806 **and HIV-1 Gag.** SIM image reconstructed in 3D using FIJI/ImageJ2. Scale bar  
807 represents 5 microns. MS2-YFP (green) and gRNA FISH (red) colocalize at intracellular  
808 vesicles and the nuclear periphery with Gag (blue). White arrows indicate colocalized  
809 MS2-YFP, gRNA, and Gag punctae at intracellular membranes.

810

811 **Video 6. Three-dimensional view of Lifeact-MS2-YFP, smFISH tagged HIV-1 gRNA,**  
812 **and HIV-1 Gag.** SIM image reconstructed in 3D using FIJI/ImageJ2. Scale bar  
813 represents 5 microns. MS2-YFP (green) and gRNA FISH (red) colocalize along linear F-  
814 actin filaments with Gag (blue). White arrows indicate colocalized MS2-YFP, gRNA, and  
815 Gag punctae along actin filaments.

816

817 **Video 7. MA-MS2-YFP induces formation of worm-like tubules of GagFP at the**  
818 **PM.** Live cell imaging of HeLa cells transfected with MA-MS2-YFP and GagFP-MSL-  
819 RRE. Only GagFP channel is shown (cyan). Images were acquired once every 30  
820 seconds and are shown here at 4 frames per second. Scale bar represents 2 microns.  
821 White arrow highlights a worm-like tubule of GagFP.  
822

823 **REFERENCES**

824

825 1. **Bertrand E, Chartrand P, Schaefer M, Shenoy SM, Singer RH, Long RM.**

826 1998. Localization of ASH1 mRNA particles in living yeast. *Mol Cell* **2**:437–445.

827 2. **Lécuyer E, Yoshida H, Parthasarathy N, Alm C, Babak T, Cerovina T, Hughes**

828 **TR, Tomancak P, Krause HM.** 2007. Global analysis of mRNA localization

829 reveals a prominent role in organizing cellular architecture and function. *Cell*

830 **131**:174–187.

831 3. **Donnelly CJ, Fainzilber M, Twiss JL.** 2010. Subcellular communication through

832 RNA transport and localized protein synthesis. *Traffic Cph Den* **11**:1498–1505.

833 4. **Sinnamon JR, Czaplinski K.** 2011. mRNA trafficking and local translation: the

834 Yin and Yang of regulating mRNA localization in neurons. *Acta Biochim Biophys*

835 *Sin* **43**:663–670.

836 5. **Buxbaum AR, Haimovich G, Singer RH.** 2015. In the right place at the right

837 time: visualizing and understanding mRNA localization. *Nat Rev Mol Cell Biol*

838 **16**:95–109.

839 6. **Jouvenet N, Neil SJD, Bess C, Johnson MC, Virgen CA, Simon SM, Bieniasz**

840 **PD.** 2006. Plasma membrane is the site of productive HIV-1 particle assembly.

841 *PLoS Biol* **4**:e435.

842 7. **Davis NL, Rueckert RR.** 1972. Properties of a ribonucleoprotein particle isolated

843 from Nonidet P-40-treated Rous sarcoma virus. *J Virol* **10**:1010–1020.

- 844 8. **Briggs JAG, Kräusslich H-G.** 2011. The molecular architecture of HIV. *J Mol Biol*  
845 **410**:491–500.
- 846 9. **Butsch M, Boris-Lawrie K.** 2002. Destiny of unspliced retroviral RNA: ribosome  
847 and/or virion? *J Virol* **76**:3089–3094.
- 848 10. **Johnson SF, Telesnitsky A.** 2010. Retroviral RNA dimerization and packaging:  
849 the what, how, when, where, and why. *PLoS Pathog* **6**:e1001007.
- 850 11. **Jouvenet N, Lainé S, Pessel-Vivares L, Mougél M.** 2011. Cell biology of  
851 retroviral RNA packaging. *RNA Biol* **8**:572–580.
- 852 12. **Kuzembayeva M, Dilley K, Sardo L, Hu W-S.** 2014. Life of psi: How full-length  
853 HIV-1 RNAs become packaged genomes in the viral particles. *Virology*.
- 854 13. **Wills JW, Craven RC.** 1991. Form, function, and use of retroviral gag proteins.  
855 *AIDS Lond Engl* **5**:639–654.
- 856 14. **Ono A, Demirov D, Freed EO.** 2000. Relationship between human  
857 immunodeficiency virus type 1 Gag multimerization and membrane binding. *J*  
858 *Virol* **74**:5142–5150.
- 859 15. **Accola MA, Strack B, Göttlinger HG.** 2000. Efficient particle production by  
860 minimal Gag constructs which retain the carboxy-terminal domain of human  
861 immunodeficiency virus type 1 capsid-p2 and a late assembly domain. *J Virol*  
862 **74**:5395–5402.



- 863 16. **Datta SAK, Zhao Z, Clark PK, Tarasov S, Alexandratos JN, Campbell SJ,**  
864 **Kvaratskhelia M, Lebowitz J, Rein A.** 2007. Interactions between HIV-1 Gag  
865 molecules in solution: an inositol phosphate-mediated switch. *J Mol Biol* **365**:799–  
866 811.
- 867 17. **Crist RM, Datta SAK, Stephen AG, Soheilian F, Mirro J, Fisher RJ,**  
868 **Nagashima K, Rein A.** 2009. Assembly properties of human immunodeficiency  
869 virus type 1 Gag-leucine zipper chimeras: implications for retrovirus assembly. *J*  
870 *Viro* **83**:2216–2225.
- 871 18. **Datta SAK, Rein A.** 2009. Preparation of recombinant HIV-1 gag protein and  
872 assembly of virus-like particles in vitro. *Methods Mol Biol Clifton NJ* **485**:197–208.
- 873 19. **Olety B, Ono A.** 2014. Roles played by acidic lipids in HIV-1 Gag membrane  
874 binding. *Virus Res.*
- 875 20. **Ono A, Freed EO.** 1999. Binding of human immunodeficiency virus type 1 Gag to  
876 membrane: role of the matrix amino terminus. *J Virol* **73**:4136–4144.
- 877 21. **Saad JS, Miller J, Tai J, Kim A, Ghanam RH, Summers MF.** 2006. Structural  
878 basis for targeting HIV-1 Gag proteins to the plasma membrane for virus  
879 assembly. *Proc Natl Acad Sci U S A* **103**:11364–11369.
- 880 22. **Ghanam RH, Samal AB, Fernandez TF, Saad JS.** 2012. Role of the HIV-1  
881 Matrix Protein in Gag Intracellular Trafficking and Targeting to the Plasma  
882 Membrane for Virus Assembly. *Front Microbiol* **3**:55.

- 883 23. **Mercredi PY, Bucca N, Loeliger B, Gaines CR, Mehta M, Bhargava P,**  
884 **Tedbury PR, Charlier L, Floquet N, Muriaux D, Favard C, Sanders CR, Freed**  
885 **EO, Marchant J, Summers MF.** 2016. Structural and Molecular Determinants of  
886 Membrane Binding by the HIV-1 Matrix Protein. *J Mol Biol.*
- 887 24. **Ganser-Pornillos BK, Yeager M, Sundquist WI.** 2008. The structural biology of  
888 HIV assembly. *Curr Opin Struct Biol* **18**:203–217.
- 889 25. **Sundquist WI, Kräusslich H-G.** 2012. HIV-1 Assembly, Budding, and Maturation.  
890 *Cold Spring Harb Perspect Med* **2**.
- 891 26. **Berkowitz RD, Ohagen A, Höglund S, Goff SP.** 1995. Retroviral nucleocapsid  
892 domains mediate the specific recognition of genomic viral RNAs by chimeric Gag  
893 polyproteins during RNA packaging in vivo. *J Virol* **69**:6445–6456.
- 894 27. **D’Souza V, Summers MF.** 2005. How retroviruses select their genomes. *Nat Rev*  
895 *Microbiol* **3**:643–655.
- 896 28. **Muriaux D, Darlix J-L.** 2010. Properties and functions of the nucleocapsid protein  
897 in virus assembly. *RNA Biol* **7**:744–753.
- 898 29. **Keane SC, Heng X, Lu K, Kharytonchyk S, Ramakrishnan V, Carter G, Barton**  
899 **S, Hosic A, Florwick A, Santos J, Bolden NC, McCowin S, Case DA, Johnson**  
900 **BA, Salemi M, Telesnitsky A, Summers MF.** 2015. Structure of the HIV-1 RNA  
901 packaging signal. *Science* **348**:917–921.

- 902 30. **Borsetti A, Ohagen A, Göttlinger HG.** 1998. The C-terminal half of the human  
903 immunodeficiency virus type 1 Gag precursor is sufficient for efficient particle  
904 assembly. *J Virol* **72**:9313–9317.
- 905 31. **Martin-Serrano J, Zang T, Bieniasz PD.** 2001. HIV-1 and Ebola virus encode  
906 small peptide motifs that recruit Tsg101 to sites of particle assembly to facilitate  
907 egress. *Nat Med* **7**:1313–1319.
- 908 32. **Martin-Serrano J, Zang T, Bieniasz PD.** 2003. Role of ESCRT-I in retroviral  
909 budding. *J Virol* **77**:4794–4804.
- 910 33. **Popov S, Popova E, Inoue M, Göttlinger HG.** 2008. Human immunodeficiency  
911 virus type 1 Gag engages the Bro1 domain of ALIX/AIP1 through the  
912 nucleocapsid. *J Virol* **82**:1389–1398.
- 913 34. **Chen J, Nikolaitchik O, Singh J, Wright A, Bencsics CE, Coffin JM, Ni N,**  
914 **Lockett S, Pathak VK, Hu W-S.** 2009. High efficiency of HIV-1 genomic RNA  
915 packaging and heterozygote formation revealed by single virion analysis. *Proc*  
916 *Natl Acad Sci U S A* **106**:13535–13540.
- 917 35. **Moore MD, Nikolaitchik OA, Chen J, Hammarskjöld M-L, Rekosh D, Hu W-S.**  
918 2009. Probing the HIV-1 genomic RNA trafficking pathway and dimerization by  
919 genetic recombination and single virion analyses. *PLoS Pathog* **5**:e1000627.
- 920 36. **Nikolaitchik OA, Dilley KA, Fu W, Gorelick RJ, Tai S-HS, Soheilian F, Ptak**  
921 **RG, Nagashima K, Pathak VK, Hu W-S.** 2013. Dimeric RNA Recognition  
922 Regulates HIV-1 Genome Packaging. *PLoS Pathog* **9**:e1003249.

- 923 37. **Lever A, Gottlinger H, Haseltine W, Sodroski J.** 1989. Identification of a  
924 sequence required for efficient packaging of human immunodeficiency virus type  
925 1 RNA into virions. *J Virol* **63**:4085–4087.
- 926 38. **Zhang Y, Barklis E.** 1995. Nucleocapsid protein effects on the specificity of  
927 retrovirus RNA encapsidation. *J Virol* **69**:5716–5722.
- 928 39. **Kutluay SB, Zang T, Blanco-Melo D, Powell C, Jannain D, Errando M,**  
929 **Bieniasz PD.** 2014. Global changes in the RNA binding specificity of HIV-1 gag  
930 regulate virion genesis. *Cell* **159**:1096–1109.
- 931 40. **Didierlaurent L, Racine PJ, Houzet L, Chamontin C, Berkhout B, Mougel M.**  
932 2011. Role of HIV-1 RNA and protein determinants for the selective packaging of  
933 spliced and unspliced viral RNA and host U6 and 7SL RNA in virus particles.  
934 *Nucleic Acids Res* **39**:8915–8927.
- 935 41. **Keene SE, Telesnitsky A.** 2012. cis-Acting determinants of 7SL RNA packaging  
936 by HIV-1. *J Virol* **86**:7934–7942.
- 937 42. **Schopman NCT, van Montfort T, Willemsen M, Knoepfel SA, Pollakis G, van**  
938 **Kampen A, Sanders RW, Haasnoot J, Berkhout B.** 2012. Selective packaging  
939 of cellular miRNAs in HIV-1 particles. *Virus Res* **169**:438–447.
- 940 43. **Eckwahl MJ, Arnion H, Kharytonchyk S, Zang T, Bieniasz PD, Telesnitsky A,**  
941 **Wolin SL.** 2016. Analysis of the human immunodeficiency virus-1 RNA  
942 packageome. *RNA N Y N*.

- 943 44. **Purohit P, Dupont S, Stevenson M, Green MR.** 2001. Sequence-specific  
944 interaction between HIV-1 matrix protein and viral genomic RNA revealed by in  
945 vitro genetic selection. *RNA N Y N* **7**:576–584.
- 946 45. **Chukkapalli V, Hogue IB, Boyko V, Hu W-S, Ono A.** 2008. Interaction between  
947 the human immunodeficiency virus type 1 Gag matrix domain and  
948 phosphatidylinositol-(4,5)-bisphosphate is essential for efficient gag membrane  
949 binding. *J Virol* **82**:2405–2417.
- 950 46. **Chukkapalli V, Oh SJ, Ono A.** 2010. Opposing mechanisms involving RNA and  
951 lipids regulate HIV-1 Gag membrane binding through the highly basic region of  
952 the matrix domain. *Proc Natl Acad Sci U S A* **107**:1600–1605.
- 953 47. **Swanson CM, Malim MH.** 2006. Retrovirus RNA trafficking: from chromatin to  
954 invasive genomes. *Traffic Cph Den* **7**:1440–1450.
- 955 48. **Cochrane AW, McNally MT, Mouland AJ.** 2006. The retrovirus RNA trafficking  
956 granule: from birth to maturity. *Retrovirology* **3**:18.
- 957 49. **Lingappa JR, Reed JC, Tanaka M, Chutiraka K, Robinson BA.** 2014. How HIV-  
958 1 Gag assembles in cells: Putting together pieces of the puzzle. *Virus Res.*
- 959 50. **Chen J, Grunwald D, Sardo L, Galli A, Plisov S, Nikolaitchik OA, Chen D,**  
960 **Lockett S, Larson DR, Pathak VK, Hu W-S.** 2014. Cytoplasmic HIV-1 RNA is  
961 mainly transported by diffusion in the presence or absence of Gag protein. *Proc*  
962 *Natl Acad Sci U S A.*

- 963 51. **Basyuk E, Galli T, Mougél M, Blanchard J-M, Sitbon M, Bertrand E.** 2003.  
964 Retroviral genomic RNAs are transported to the plasma membrane by endosomal  
965 vesicles. *Dev Cell* **5**:161–174.
- 966 52. **Poole E, Strappe P, Mok H-P, Hicks R, Lever AML.** 2005. HIV-1 Gag-RNA  
967 interaction occurs at a perinuclear/centrosomal site; analysis by confocal  
968 microscopy and FRET. *Traffic Cph Den* **6**:741–755.
- 969 53. **Lehmann M, Milev MP, Abrahamyan L, Yao X-J, Pante N, Mouland AJ.** 2009.  
970 Intracellular transport of human immunodeficiency virus type 1 genomic RNA and  
971 viral production are dependent on dynein motor function and late endosome  
972 positioning. *J Biol Chem* **284**:14572–14585.
- 973 54. **Perez-Caballero D, Hatzioannou T, Martin-Serrano J, Bieniasz PD.** 2004.  
974 Human immunodeficiency virus type 1 matrix inhibits and confers cooperativity on  
975 gag precursor-membrane interactions. *J Virol* **78**:9560–9563.
- 976 55. **Göttlinger HG, Sodroski JG, Haseltine WA.** 1989. Role of capsid precursor  
977 processing and myristoylation in morphogenesis and infectivity of human  
978 immunodeficiency virus type 1. *Proc Natl Acad Sci U S A* **86**:5781–5785.
- 979 56. **Hermida-Matsumoto L, Resh MD.** 1999. Human immunodeficiency virus type 1  
980 protease triggers a myristoyl switch that modulates membrane binding of  
981 Pr55(gag) and p17MA. *J Virol* **73**:1902–1908.

- 982 57. **Li H, Dou J, Ding L, Spearman P.** 2007. Myristoylation is required for human  
983 immunodeficiency virus type 1 Gag-Gag multimerization in mammalian cells. *J*  
984 *Virology* **81**:12899–12910.
- 985 58. **Chen J, Rahman SA, Nikolaitchik OA, Grunwald D, Sardo L, Burdick RC,**  
986 **Plisov S, Liang E, Tai S, Pathak VK, Hu W-S.** 2016. HIV-1 RNA genome  
987 dimerizes on the plasma membrane in the presence of Gag protein. *Proc Natl*  
988 *Acad Sci U S A* **113**:E201–208.
- 989 59. **Jouvenet N, Simon SM, Bieniasz PD.** 2009. Imaging the interaction of HIV-1  
990 genomes and Gag during assembly of individual viral particles. *Proc Natl Acad Sci*  
991 *U S A* **106**:19114–19119.
- 992 60. **Ivanchenko S, Godinez WJ, Lampe M, Kräusslich H-G, Eils R, Rohr K,**  
993 **Bräuchle C, Müller B, Lamb DC.** 2009. Dynamics of HIV-1 assembly and  
994 release. *PLoS Pathog* **5**:e1000652.
- 995 61. **Ku P-I, Miller AK, Ballew J, Sandrin V, Adler FR, Saffarian S.** 2013.  
996 Identification of Pauses during Formation of HIV-1 Virus Like Particles. *Biophys J*  
997 **105**:2262–2272.
- 998 62. **Sardo L, Hatch SC, Chen J, Nikolaitchik O, Burdick RC, Chen D, Westlake**  
999 **CJ, Lockett S, Pathak VK, Hu W-S.** 2015. The Dynamics of HIV-1 RNA Near the  
1000 Plasma Membrane During Virus Assembly. *J Virology*.
- 1001 63. **Schwartz S, Campbell M, Nasioulas G, Harrison J, Felber BK, Pavlakis GN.**  
1002 1992. Mutational inactivation of an inhibitory sequence in human

- 1003 immunodeficiency virus type 1 results in Rev-independent gag expression. *J Virol*  
1004 **66**:7176–7182.
- 1005 64. **Naldini L, Blömer U, Gallay P, Ory D, Mulligan R, Gage FH, Verma IM, Trono**  
1006 **D.** 1996. In vivo gene delivery and stable transduction of nondividing cells by a  
1007 lentiviral vector. *Science* **272**:263–267.
- 1008 65. **Kotsopoulou E, Kim VN, Kingsman AJ, Kingsman SM, Mitrophanous KA.**  
1009 2000. A Rev-independent human immunodeficiency virus type 1 (HIV-1)-based  
1010 vector that exploits a codon-optimized HIV-1 gag-pol gene. *J Virol* **74**:4839–4852.
- 1011 66. **Swanson CM, Puffer BA, Ahmad KM, Doms RW, Malim MH.** 2004. Retroviral  
1012 mRNA nuclear export elements regulate protein function and virion assembly.  
1013 *EMBO J* **23**:2632–2640.
- 1014 67. **Jin J, Sturgeon T, Chen C, Watkins SC, Weisz OA, Montelaro RC.** 2007.  
1015 Distinct intracellular trafficking of equine infectious anemia virus and human  
1016 immunodeficiency virus type 1 Gag during viral assembly and budding revealed  
1017 by bimolecular fluorescence complementation assays. *J Virol* **81**:11226–11235.
- 1018 68. **Jin J, Sturgeon T, Weisz OA, Mothes W, Montelaro RC.** 2009. HIV-1 matrix  
1019 dependent membrane targeting is regulated by Gag mRNA trafficking. *PloS One*  
1020 **4**:e6551.
- 1021 69. **Sherer NM, Swanson CM, Papaioannou S, Malim MH.** 2009. Matrix mediates  
1022 the functional link between human immunodeficiency virus type 1 RNA nuclear



- 1023 export elements and the assembly competency of Gag in murine cells. *J Virol*  
1024 **83**:8525–8535.
- 1025 70. **Malim MH, Cullen BR.** 1993. Rev and the fate of pre-mRNA in the nucleus:  
1026 implications for the regulation of RNA processing in eukaryotes. *Mol Cell Biol*  
1027 **13**:6180–6189.
- 1028 71. **Hope TJ.** 1997. Viral RNA export. *Chem Biol* **4**:335–344.
- 1029 72. **Cullen BR.** 2003. Nuclear mRNA export: insights from virology. *Trends Biochem*  
1030 *Sci* **28**:419–424.
- 1031 73. **Malim MH, Hauber J, Fenrick R, Cullen BR.** 1988. Immunodeficiency virus rev  
1032 trans-activator modulates the expression of the viral regulatory genes. *Nature*  
1033 **335**:181–183.
- 1034 74. **Malim MH, Tiley LS, McCarn DF, Rusche JR, Hauber J, Cullen BR.** 1990. HIV-  
1035 1 structural gene expression requires binding of the Rev trans-activator to its RNA  
1036 target sequence. *Cell* **60**:675–683.
- 1037 75. **Sherer NM, Swanson CM, Hué S, Roberts RG, Bergeron JRC, Malim MH.**  
1038 2011. Evolution of a species-specific determinant within human CRM1 that  
1039 regulates the post-transcriptional phases of HIV-1 replication. *PLoS Pathog*  
1040 **7**:e1002395.
- 1041 76. **Bray M, Prasad S, Dubay JW, Hunter E, Jeang KT, Rekosh D, Hammarskjöld**  
1042 **ML.** 1994. A small element from the Mason-Pfizer monkey virus genome makes

- 1043 human immunodeficiency virus type 1 expression and replication Rev-  
1044 independent. Proc Natl Acad Sci U S A **91**:1256–1260.
- 1045 77. **Ernst RK, Bray M, Rekosh D, Hammarskjöld ML.** 1997. A structured retroviral  
1046 RNA element that mediates nucleocytoplasmic export of intron-containing RNA.  
1047 Mol Cell Biol **17**:135–144.
- 1048 78. **Pasquinelli AE, Ernst RK, Lund E, Grimm C, Zapp ML, Rekosh D,**  
1049 **Hammarskjöld ML, Dahlberg JE.** 1997. The constitutive transport element (CTE)  
1050 of Mason-Pfizer monkey virus (MPMV) accesses a cellular mRNA export  
1051 pathway. EMBO J **16**:7500–7510.
- 1052 79. **Rizvi TA, Schmidt RD, Lew KA.** 1997. Mason-Pfizer monkey virus (MPMV)  
1053 constitutive transport element (CTE) functions in a position-dependent manner.  
1054 Virology **236**:118–129.
- 1055 80. **Pessel-Vivares L, Ferrer M, Lainé S, Mougél M.** 2014. MLV requires Tap/NXF1-  
1056 dependent pathway to export its unspliced RNA to the cytoplasm and to express  
1057 both spliced and unspliced RNAs. Retrovirology **11**:21.
- 1058 81. **Pocock GM, Becker JT, Swanson CM, Ahlquist P, Sherer NM.** 2016. HIV-1  
1059 and M-PMV RNA Nuclear Export Elements Program Viral Genomes for Distinct  
1060 Cytoplasmic Trafficking Behaviors. PLoS Pathog **12**:e1005565.
- 1061 82. **Adachi A, Gendelman HE, Koenig S, Folks T, Willey R, Rabson A, Martin MA.**  
1062 1986. Production of acquired immunodeficiency syndrome-associated retrovirus in

- 1063 human and nonhuman cells transfected with an infectious molecular clone. *J Virol*  
1064 **59**:284–291.
- 1065 83. **Aligeti M, Behrens RT, Pocock GM, Schindelin J, Dietz C, Eliceiri KW,**  
1066 **Swanson CM, Malim MH, Ahlquist P, Sherer NM.** 2014. Cooperativity Among  
1067 Rev-Associated Nuclear Export Signals Regulates HIV-1 Gene Expression and is  
1068 a Determinant of Virus Species Tropism. *J Virol*.
- 1069 84. **Hermida-Matsumoto L, Resh MD.** 2000. Localization of human  
1070 immunodeficiency virus type 1 Gag and Env at the plasma membrane by confocal  
1071 imaging. *J Virol* **74**:8670–8679.
- 1072 85. **Subach OM, Cranfill PJ, Davidson MW, Verkhusha VV.** 2011. An Enhanced  
1073 Monomeric Blue Fluorescent Protein with the High Chemical Stability of the  
1074 Chromophore. *PLoS ONE* **6**:e28674.
- 1075 86. **Swanson CM, Sherer NM, Malim MH.** 2010. SRp40 and SRp55 promote the  
1076 translation of unspliced human immunodeficiency virus type 1 RNA. *J Virol*  
1077 **84**:6748–6759.
- 1078 87. **Swanson CM, Puffer BA, Ahmad KM, Doms RW, Malim MH.** 2004. Retroviral  
1079 mRNA nuclear export elements regulate protein function and virion assembly.  
1080 *EMBO J* **23**:2632–2640.
- 1081 88. **Femino AM, Fay FS, Fogarty K, Singer RH.** 1998. Visualization of single RNA  
1082 transcripts in situ. *Science* **280**:585–590.

- 1083 89. **Sigal CT, Zhou W, Buser CA, McLaughlin S, Resh MD.** 1994. Amino-terminal  
1084 basic residues of Src mediate membrane binding through electrostatic interaction  
1085 with acidic phospholipids. *Proc Natl Acad Sci U S A* **91**:12253–12257.
- 1086 90. **Kalderon D, Roberts BL, Richardson WD, Smith AE.** 1984. A short amino acid  
1087 sequence able to specify nuclear location. *Cell* **39**:499–509.
- 1088 91. **Sheehy AM, Gaddis NC, Choi JD, Malim MH.** 2002. Isolation of a human gene  
1089 that inhibits HIV-1 infection and is suppressed by the viral Vif protein. *Nature*  
1090 **418**:646–650.
- 1091 92. **Chesebro B, Wehrly K, Nishio J, Perryman S.** 1992. Macrophage-tropic human  
1092 immunodeficiency virus isolates from different patients exhibit unusual V3  
1093 envelope sequence homogeneity in comparison with T-cell-tropic isolates:  
1094 definition of critical amino acids involved in cell tropism. *J Virol* **66**:6547–6554.
- 1095 93. **Raj A, van den Bogaard P, Rifkin SA, van Oudenaarden A, Tyagi S.** 2008.  
1096 Imaging individual mRNA molecules using multiple singly labeled probes. *Nat*  
1097 *Methods* **5**:877–879.
- 1098 94. **Chou Y, Heaton NS, Gao Q, Palese P, Singer RH, Singer R, Lionnet T.** 2013.  
1099 Colocalization of different influenza viral RNA segments in the cytoplasm before  
1100 viral budding as shown by single-molecule sensitivity FISH analysis. *PLoS Pathog*  
1101 **9**:e1003358.
- 1102 95. **Schindelin J, Arganda-Carreras I, Frise E, Kaynig V, Longair M, Pietzsch T,**  
1103 **Preibisch S, Rueden C, Saalfeld S, Schmid B, Tinevez J-Y, White DJ,**

- 1104        **Hartenstein V, Eliceiri K, Tomancak P, Cardona A.** 2012. Fiji: an open-source  
1105        platform for biological-image analysis. *Nat Methods* **9**:676–682.
- 1106    96.    **Buck CB, Shen X, Egan MA, Pierson TC, Walker CM, Siliciano RF.** 2001. The  
1107        human immunodeficiency virus type 1 gag gene encodes an internal ribosome  
1108        entry site. *J Virol* **75**:181–191.
- 1109    97.    **Poon DTK, Chertova EN, Ott DE.** 2002. Human immunodeficiency virus type 1  
1110        preferentially encapsidates genomic RNAs that encode Pr55(Gag): functional  
1111        linkage between translation and RNA packaging. *Virology* **293**:368–378.
- 1112    98.    **Dykeman EC, Stockley PG, Twarock R.** 2014. Solving a Levinthal’s paradox for  
1113        virus assembly identifies a unique antiviral strategy. *Proc Natl Acad Sci U S A*  
1114        **111**:5361–5366.
- 1115    99.    **Patel N, Dykeman EC, Coutts RHA, Lomonossoff GP, Rowlands DJ, Phillips**  
1116        **SEV, Ranson N, Twarock R, Tuma R, Stockley PG.** 2015. Revealing the density  
1117        of encoded functions in a viral RNA. *Proc Natl Acad Sci* 201420812.
- 1118    100. **Stockley PG, White SJ, Dykeman E, Manfield I, Rolfsson O, Patel N, Bingham**  
1119        **R, Barker A, Wroblewski E, Chandler-Bostock R, Weiß EU, Ranson NA,**  
1120        **Tuma R, Twarock R.** 2016. Bacteriophage MS2 genomic RNA encodes an  
1121        assembly instruction manual for its capsid. *Bacteriophage* **6**:e1157666.
- 1122    101. **Rolfsson Ó, Middleton S, Manfield IW, White SJ, Fan B, Vaughan R, Ranson**  
1123        **NA, Dykeman E, Twarock R, Ford J, Cheng Kao C, Stockley PG.** 2016. Direct

- 1124 Evidence for Packaging Signal-Mediated Assembly of Bacteriophage MS2. *J Mol*  
1125 *Biol* **428**:431–448.
- 1126 102. **Yang J, Bogerd HP, Wang PJ, Page DC, Cullen BR.** 2001. Two closely related  
1127 human nuclear export factors utilize entirely distinct export pathways. *Mol Cell*  
1128 **8**:397–406.
- 1129 103. **Wiegand HL, Coburn GA, Zeng Y, Kang Y, Bogerd HP, Cullen BR.** 2002.  
1130 Formation of Tap/NXT1 heterodimers activates Tap-dependent nuclear mRNA  
1131 export by enhancing recruitment to nuclear pore complexes. *Mol Cell Biol* **22**:245–  
1132 256.
- 1133 104. **Jolly C, Kashefi K, Hollinshead M, Sattentau QJ.** 2004. HIV-1 Cell to Cell  
1134 Transfer across an Env-induced, Actin-dependent Synapse. *J Exp Med* **199**:283–  
1135 293.
- 1136 105. **Sasaki H, Ozaki H, Karaki H, Nonomura Y.** 2004. Actin filaments play an  
1137 essential role for transport of nascent HIV-1 proteins in host cells. *Biochem*  
1138 *Biophys Res Commun* **316**:588–593.
- 1139 106. **Jolly C, Mitar I, Sattentau QJ.** 2007. Requirement for an Intact T-Cell Actin and  
1140 Tubulin Cytoskeleton for Efficient Assembly and Spread of Human  
1141 Immunodeficiency Virus Type 1. *J Virol* **81**:5547–5560.
- 1142 107. **Cooper J, Liu L, Woodruff EA, Taylor HE, Goodwin JS, D'Aquila RT,**  
1143 **Spearman P, Hildreth JEK, Dong X.** 2011. Filamin A protein interacts with

- 1144 human immunodeficiency virus type 1 Gag protein and contributes to productive  
1145 particle assembly. *J Biol Chem* **286**:28498–28510.
- 1146 108. **Wen X, Ding L, Hunter E, Spearman P.** 2014. An siRNA screen of membrane  
1147 trafficking genes highlights pathways common to HIV-1 and M-PMV virus  
1148 assembly and release. *PloS One* **9**:e106151.
- 1149 109. **Wen X, Ding L, Wang J-J, Qi M, Hammonds J, Chu H, Chen X, Hunter E,**  
1150 **Spearman P.** 2014. ROCK1 and LIM kinase modulate retrovirus particle release  
1151 and cell-cell transmission events. *J Virol* **88**:6906–6921.
- 1152 110. **Ott DE, Coren LV, Kane BP, Busch LK, Johnson DG, Sowder RC, Chertova**  
1153 **EN, Arthur LO, Henderson LE.** 1996. Cytoskeletal proteins inside human  
1154 immunodeficiency virus type 1 virions. *J Virol* **70**:7734–7743.
- 1155 111. **Thomas A, Mariani-Floderer C, López-Huertas MR, Gros N, Hamard-Péron E,**  
1156 **Favard C, Ohlmann T, Alcamí J, Muriaux D.** 2015. Involvement of the Rac1-  
1157 IRSp53-Wave2-Arp2/3 Signaling Pathway in HIV-1 Gag Particle Release in CD4  
1158 T Cells. *J Virol* **89**:8162–8181.
- 1159 112. **Riedl J, Crevenna AH, Kessenbrock K, Yu JH, Neukirchen D, Bista M, Bradke**  
1160 **F, Jenne D, Holak TA, Werb Z, Sixt M, Wedlich-Soldner R.** 2008. Lifeact: a  
1161 versatile marker to visualize F-actin. *Nat Methods* **5**:605–607.
- 1162 113. **Saad JS, Loeliger E, Luncsford P, Liriano M, Tai J, Kim A, Miller J, Joshi A,**  
1163 **Freed EO, Summers MF.** 2007. Point mutations in the HIV-1 matrix protein turn  
1164 off the myristyl switch. *J Mol Biol* **366**:574–585.

- 1165 114. **Bleck M, Itano MS, Johnson DS, Thomas VK, North AJ, Bieniasz PD, Simon**  
1166 **SM.** 2014. Temporal and spatial organization of ESCRT protein recruitment during  
1167 HIV-1 budding. *Proc Natl Acad Sci U S A*.
- 1168 115. **Morikawa Y, Hockley DJ, Nermut MV, Jones IM.** 2000. Roles of matrix, p2, and  
1169 N-terminal myristoylation in human immunodeficiency virus type 1 Gag assembly.  
1170 *J Virol* **74**:16–23.
- 1171 116. **Briggs JAG, Wilk T, Welker R, Kräusslich H-G, Fuller SD.** 2003. Structural  
1172 organization of authentic, mature HIV-1 virions and cores. *EMBO J* **22**:1707–  
1173 1715.
- 1174 117. **Benjamin J, Ganser-Pornillos BK, Tivol WF, Sundquist WI, Jensen GJ.** 2005.  
1175 Three-dimensional structure of HIV-1 virus-like particles by electron  
1176 cryotomography. *J Mol Biol* **346**:577–588.
- 1177 118. **Datta SAK, Temeselew LG, Crist RM, Soheilian F, Kamata A, Mirro J, Harvin**  
1178 **D, Nagashima K, Cachau RE, Rein A.** 2011. On the role of the SP1 domain in  
1179 HIV-1 particle assembly: a molecular switch? *J Virol* **85**:4111–4121.
- 1180 119. **Datta SAK, Clark PK, Fan L, Ma B, Harvin DP, Sowder RC, Nussinov R, Wang**  
1181 **Y-X, Rein A.** 2015. Dimerization of the SP1 Region of HIV-1 Gag Induces a  
1182 Helical Conformation and Association into Helical Bundles: Implications for  
1183 Particle Assembly. *J Virol* **90**:1773–1787.
- 1184 120. **Ward AM, Rekosh D, Hammarskjold M-L.** 2009. Trafficking through the  
1185 Rev/RRE pathway is essential for efficient inhibition of human immunodeficiency



- 1186 virus type 1 by an antisense RNA derived from the envelope gene. *J Virol* **83**:940–  
1187 952.
- 1188 121. **Groom HCT, Anderson EC, Dangerfield JA, Lever AML.** 2009. Rev regulates  
1189 translation of human immunodeficiency virus type 1 RNAs. *J Gen Virol* **90**:1141–  
1190 1147.
- 1191 122. **Brandt S, Blissenbach M, Grewe B, Konietzny R, Grunwald T, Uberla K.**  
1192 2007. Rev proteins of human and simian immunodeficiency virus enhance RNA  
1193 encapsidation. *PLoS Pathog* **3**:e54.
- 1194 123. **Grewe B, Uberla K.** 2010. The human immunodeficiency virus type 1 Rev  
1195 protein: ménage à trois during the early phase of the lentiviral replication cycle. *J*  
1196 *Gen Virol* **91**:1893–1897.
- 1197 124. **Bolinger C, Boris-Lawrie K.** 2009. Mechanisms employed by retroviruses to  
1198 exploit host factors for translational control of a complicated proteome.  
1199 *Retrovirology* **6**:8.
- 1200 125. **Arrigo SJ, Chen IS.** 1991. Rev is necessary for translation but not cytoplasmic  
1201 accumulation of HIV-1 vif, vpr, and env/vpu 2 RNAs. *Genes Dev* **5**:808–819.
- 1202 126. **D'Agostino DM, Felber BK, Harrison JE, Pavlakis GN.** 1992. The Rev protein  
1203 of human immunodeficiency virus type 1 promotes polysomal association and  
1204 translation of gag/pol and vpu/env mRNAs. *Mol Cell Biol* **12**:1375–1386.

- 1205 127. **Diaz-Griffero F, Taube R, Muehlbauer SM, Brojatsch J.** 2008. Efficient  
1206 production of HIV-1 viral-like particles in mouse cells. *Biochem Biophys Res*  
1207 *Commun* **368**:463–469.
- 1208 128. **Jin J, Sturgeon T, Weisz OA, Mothes W, Montelaro RC.** 2009. HIV-1 matrix  
1209 dependent membrane targeting is regulated by Gag mRNA trafficking. *PLoS One*  
1210 **4**:e6551.
- 1211 129. **Jin J, Sturgeon T, Chen C, Watkins SC, Weisz OA, Montelaro RC.** 2007.  
1212 Distinct intracellular trafficking of equine infectious anemia virus and human  
1213 immunodeficiency virus type 1 Gag during viral assembly and budding revealed  
1214 by bimolecular fluorescence complementation assays. *J Virol* **81**:11226–11235.
- 1215 130. **Stake M, Singh D, Singh G, Marcela Hernandez J, Kaddis Maldonado R,**  
1216 **Parent LJ, Boris-Lawrie K.** 2015. HIV-1 and two avian retroviral 5' untranslated  
1217 regions bind orthologous human and chicken RNA binding proteins. *Virology*  
1218 **486**:307–320.
- 1219 131. **Herrera-Carrillo E, Berkhout B.** 2015. Bone Marrow Gene Therapy for  
1220 HIV/AIDS. *Viruses* **7**:3910–3936.
- 1221

## Figure 1

### A. WT NL4-3 E-R-

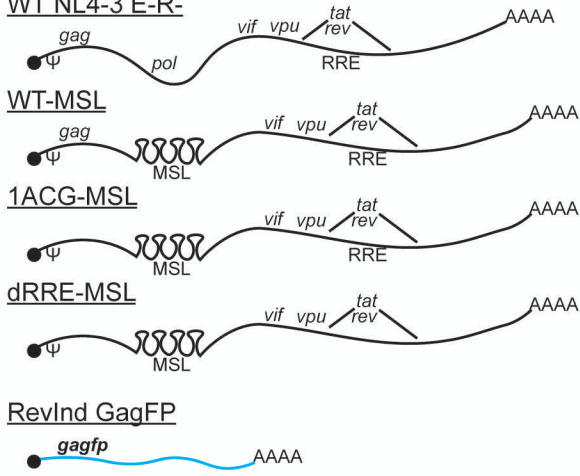

### B.

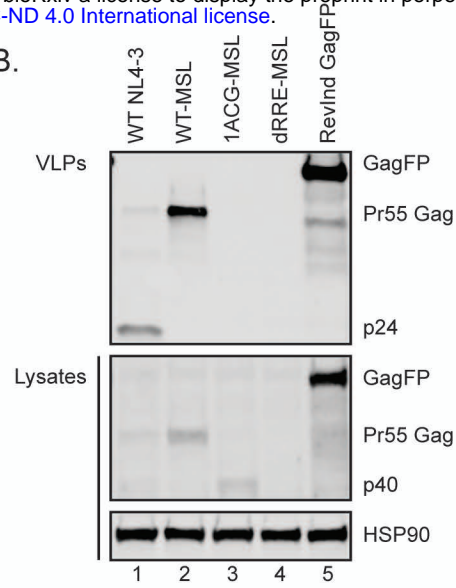

### C.

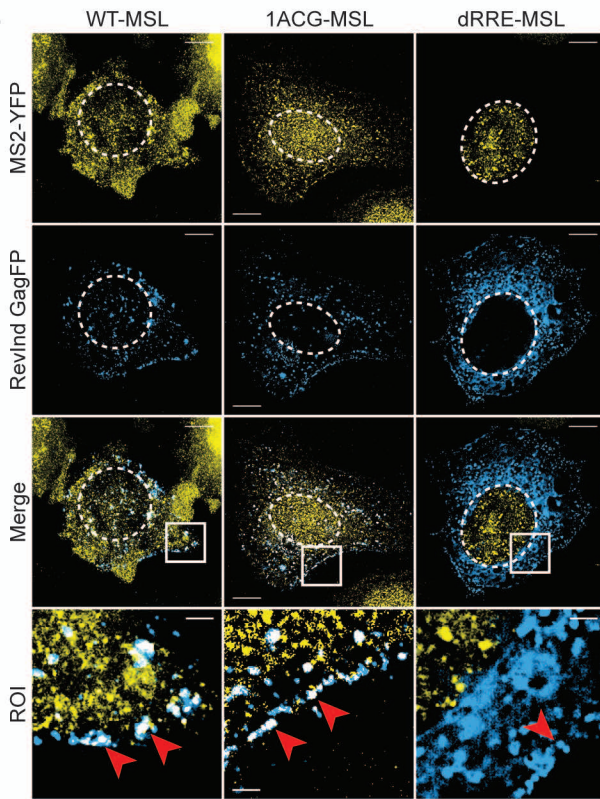

### D.

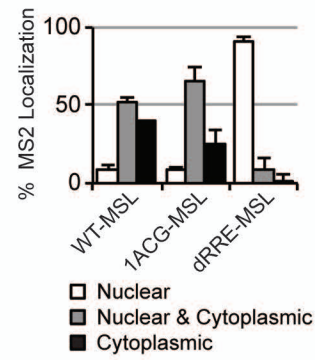

### E.

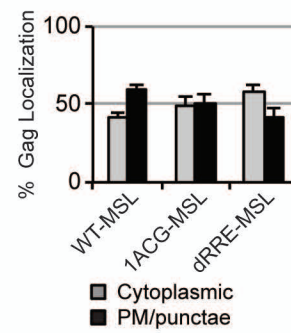

### F.

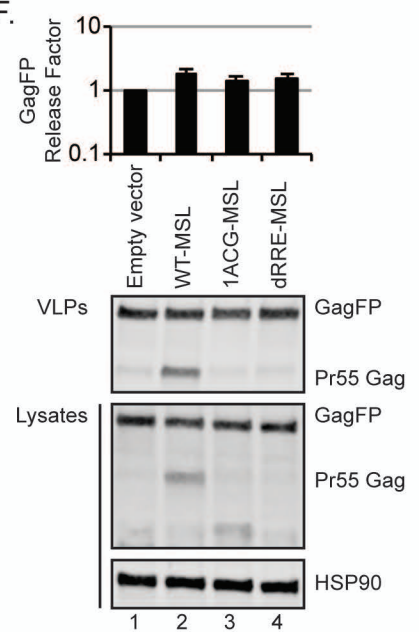

## Figure 2

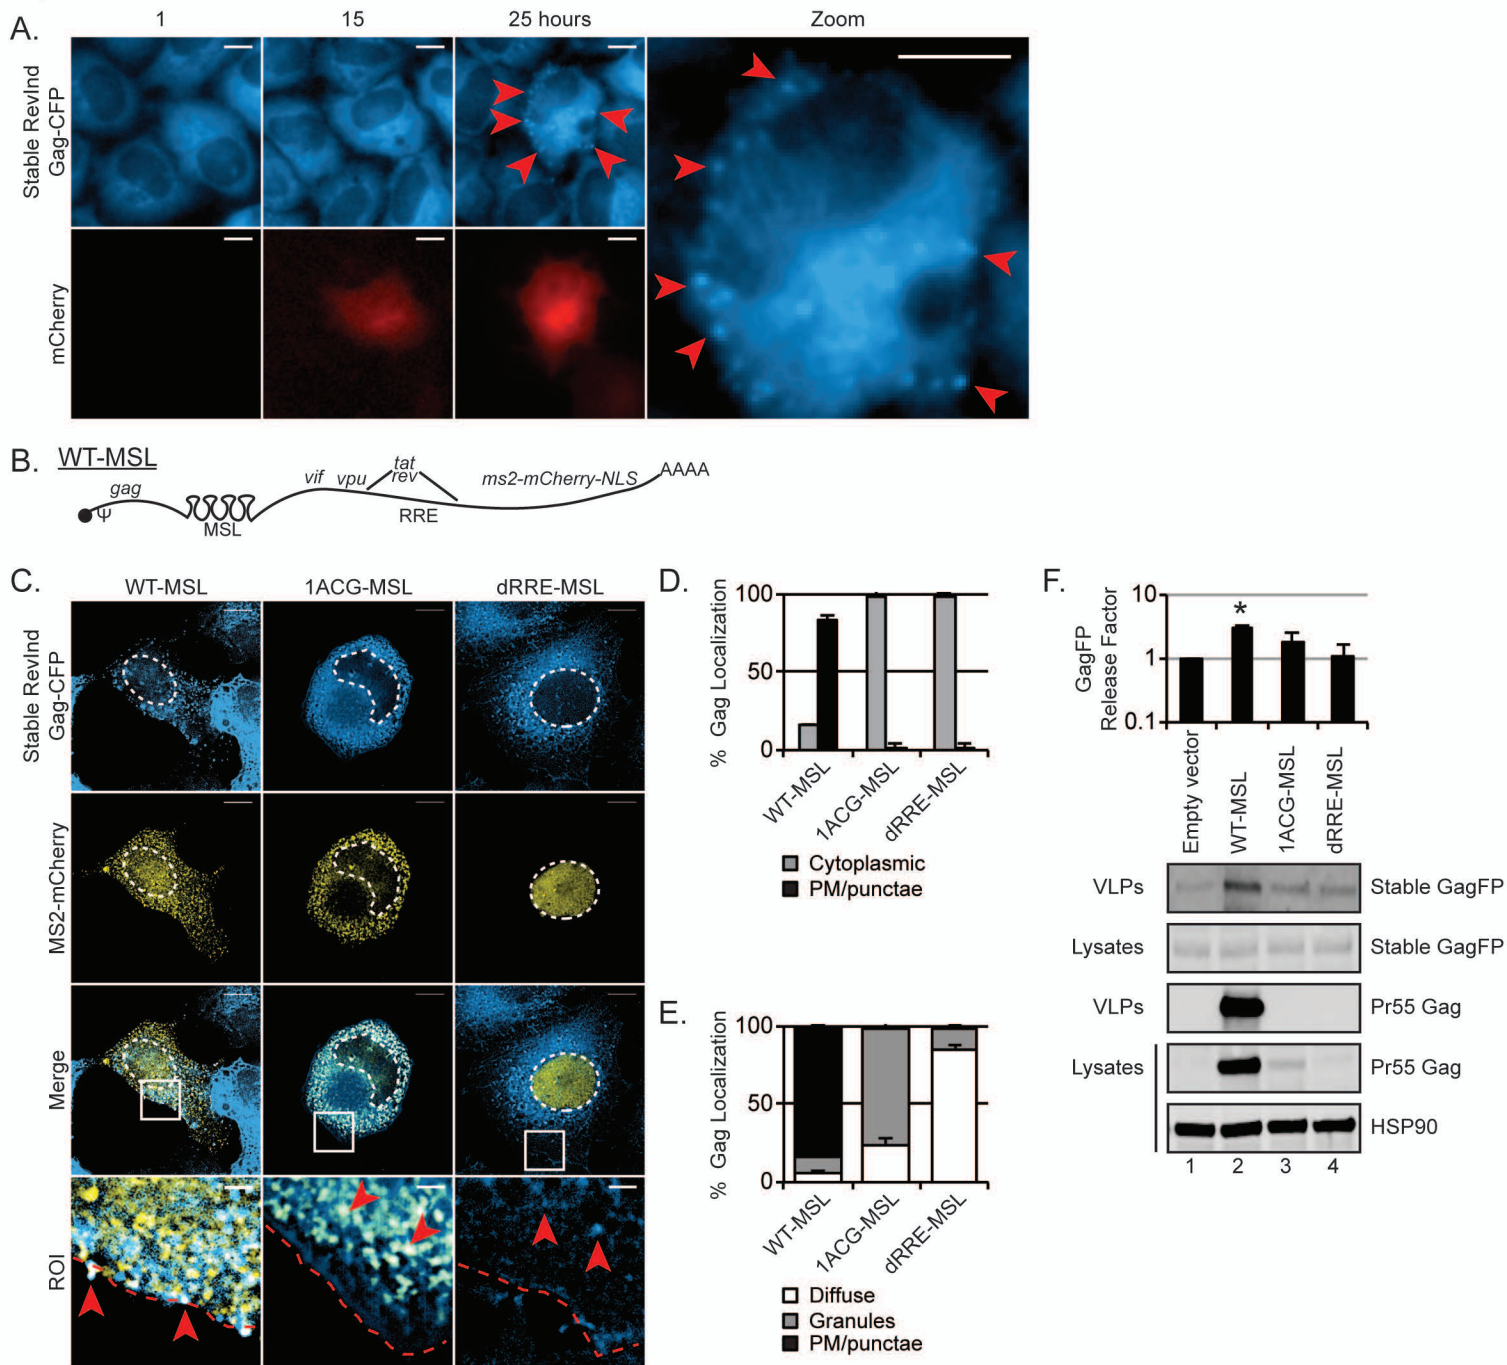

### Figure 3

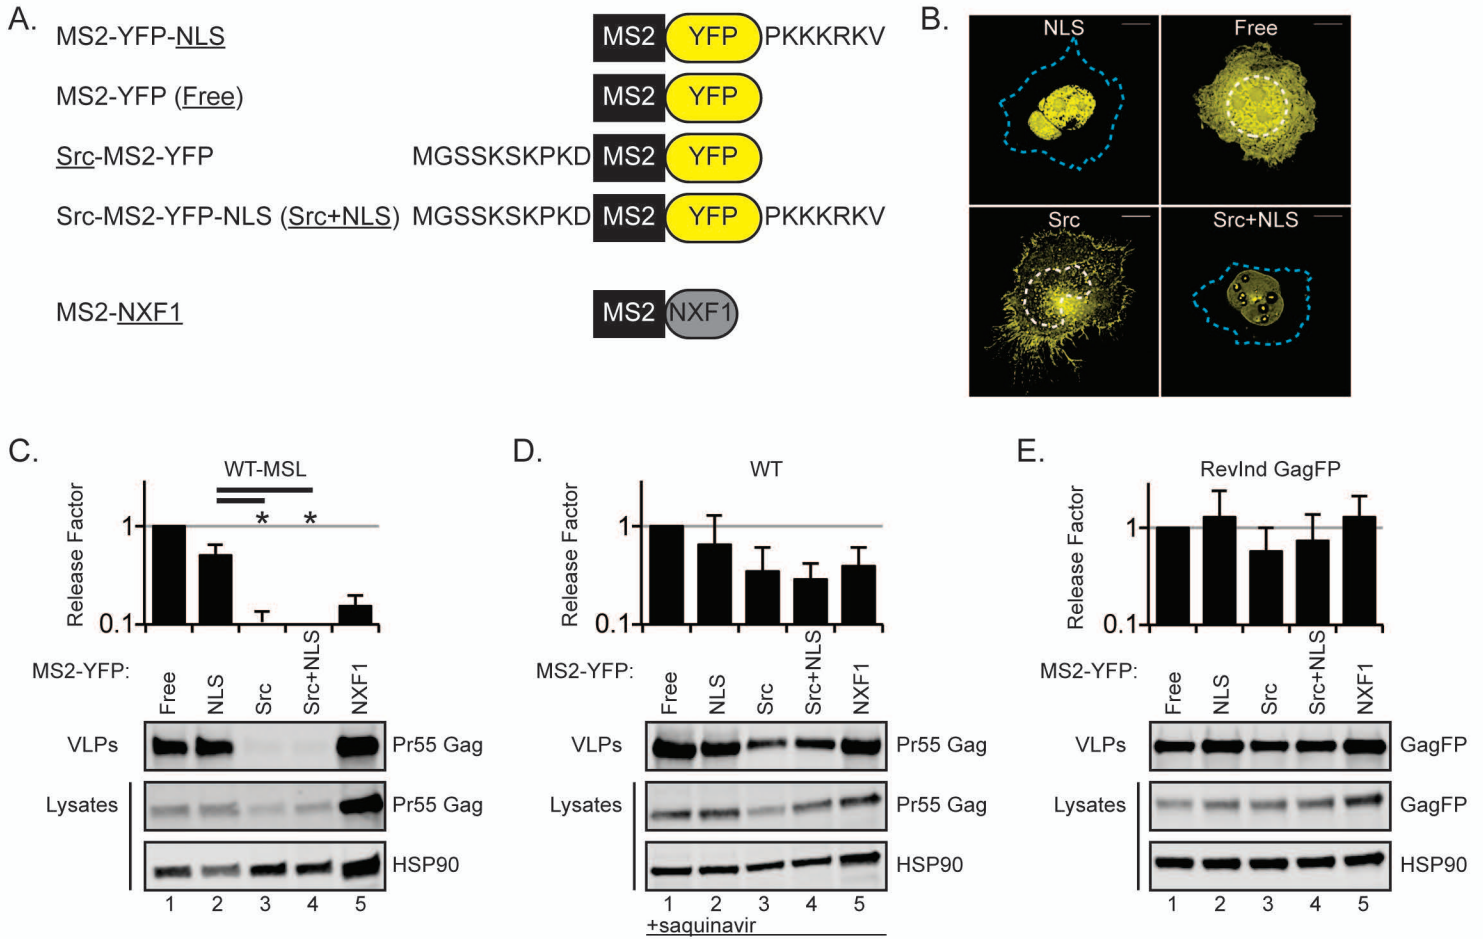

## Figure 4

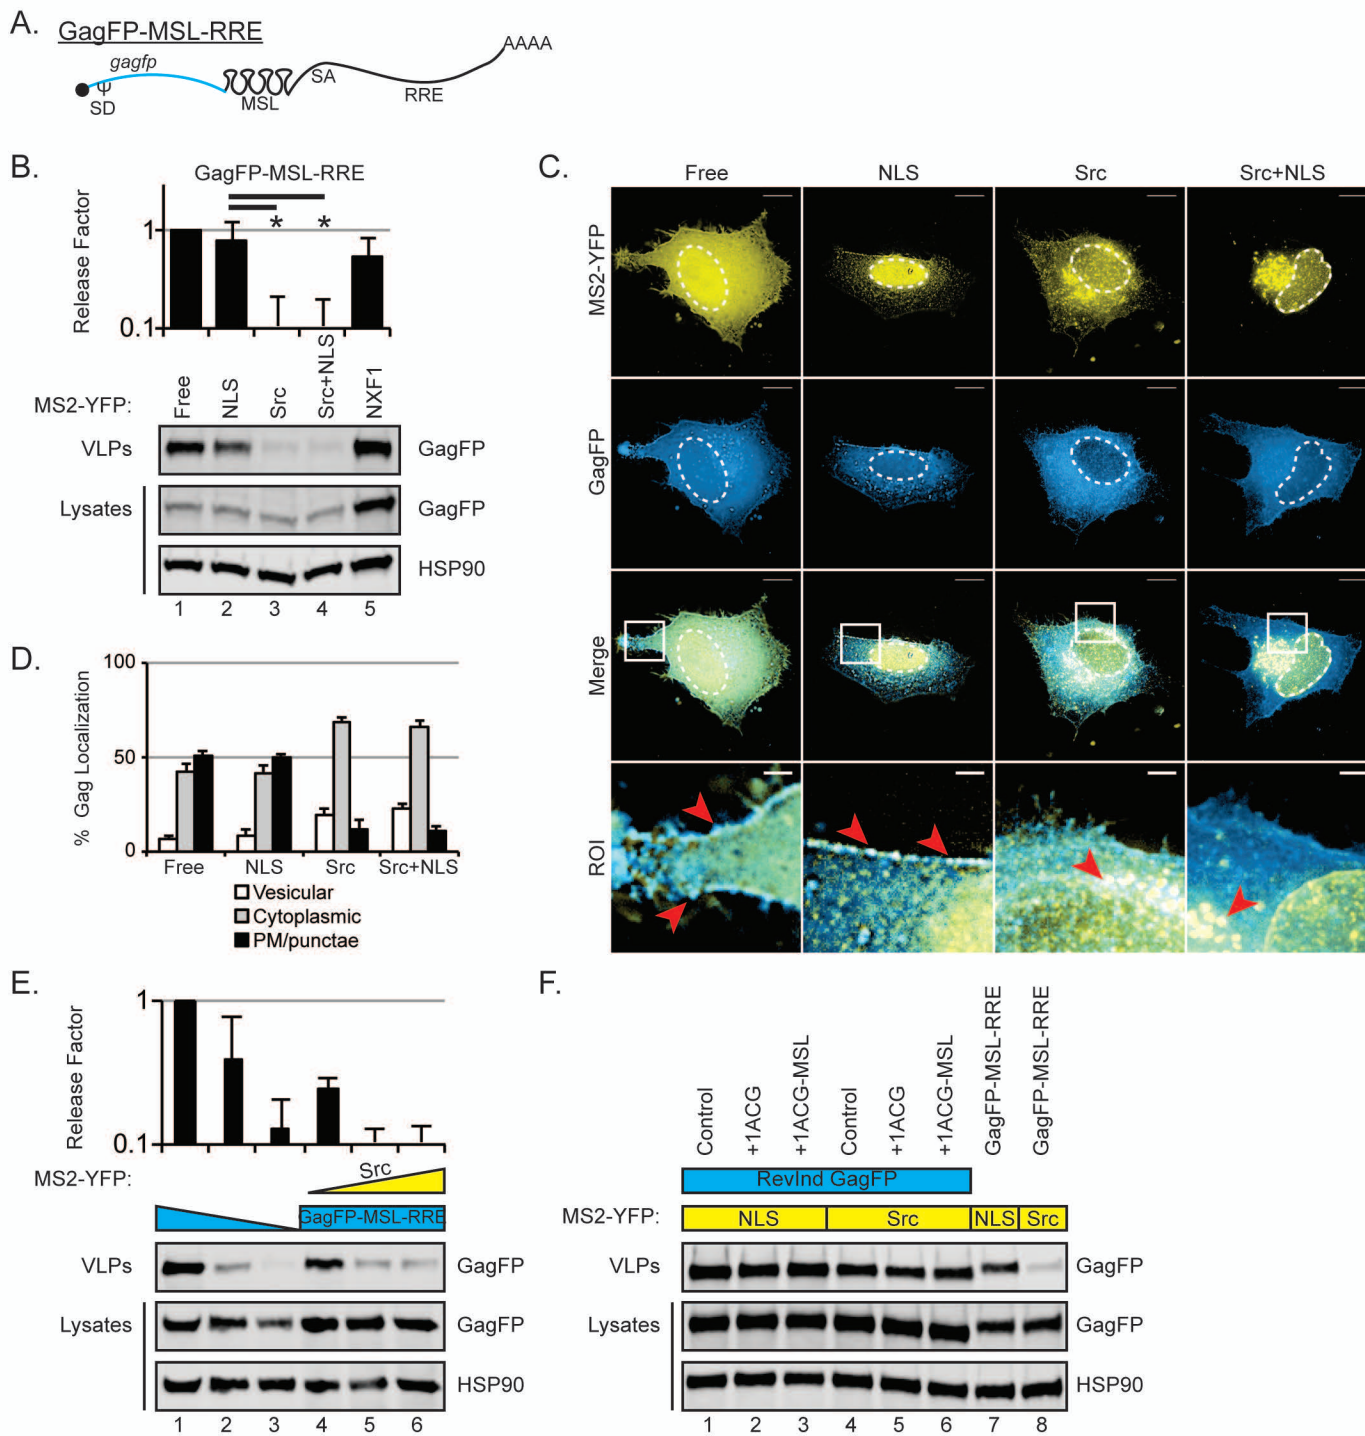

Figure 5

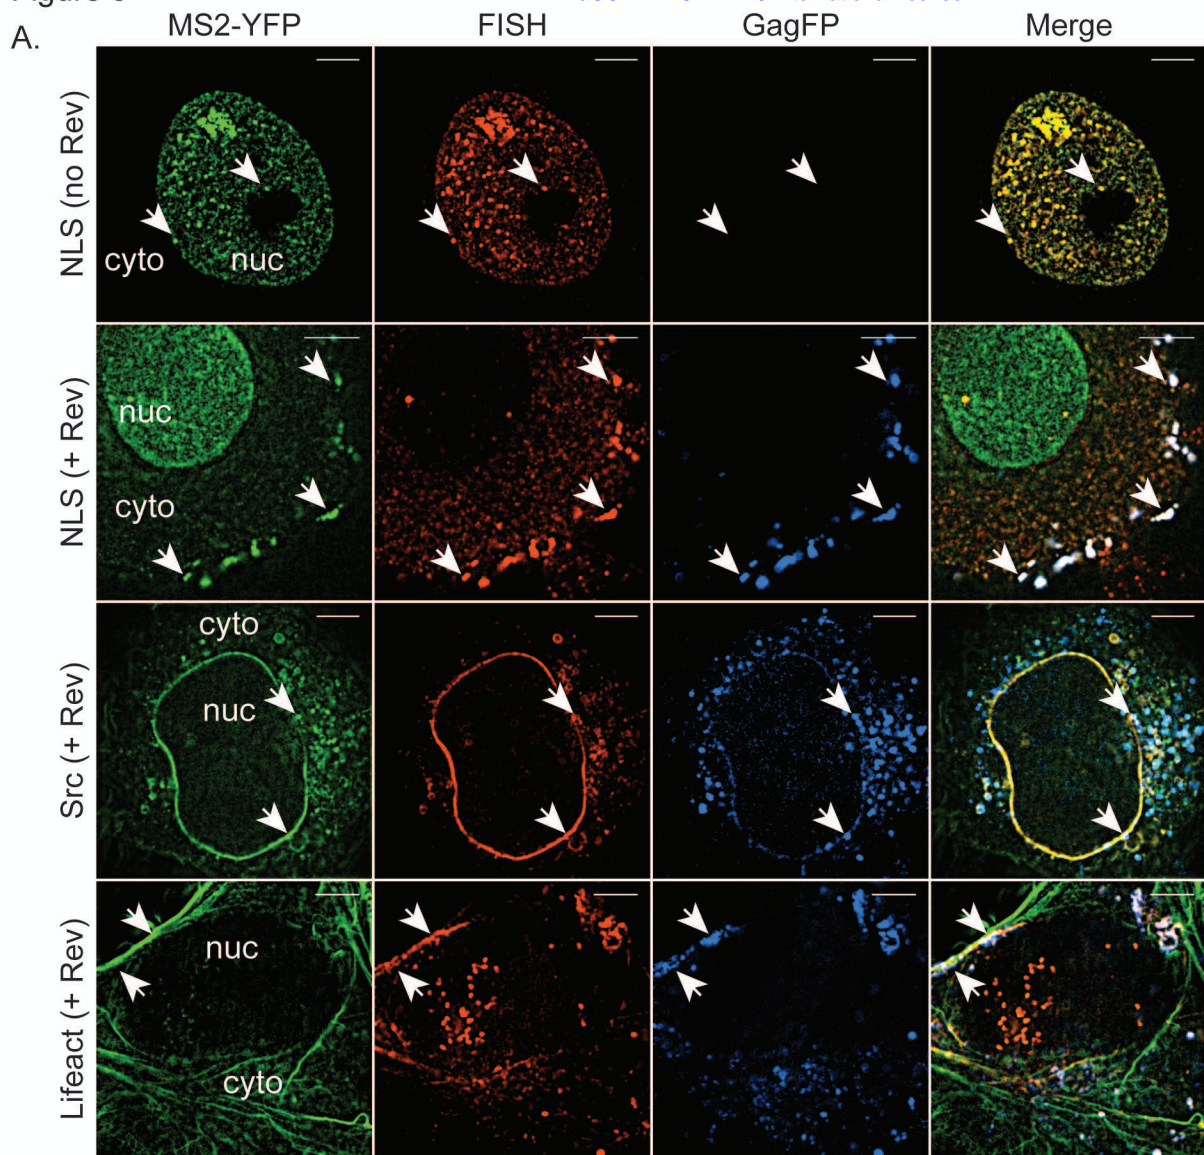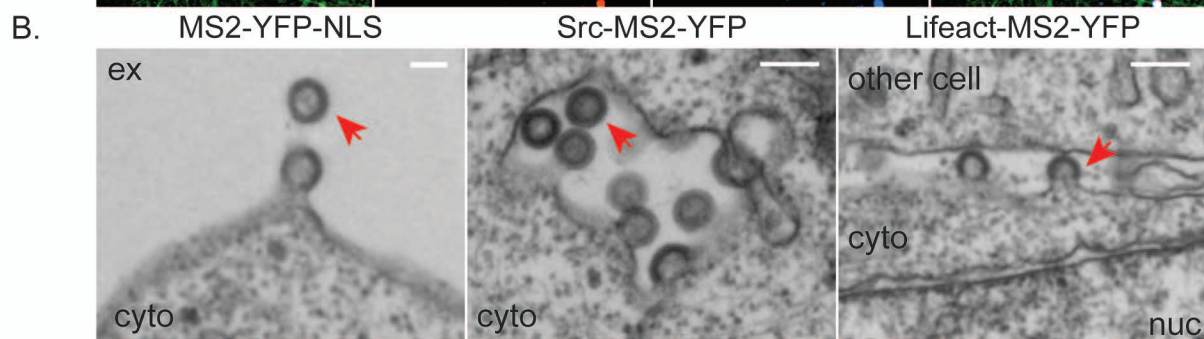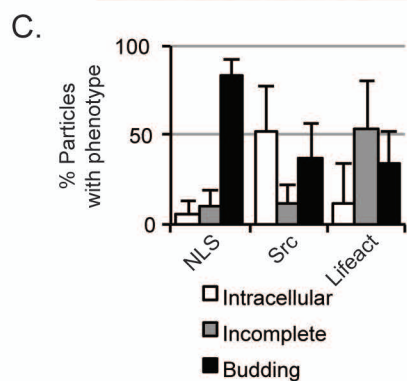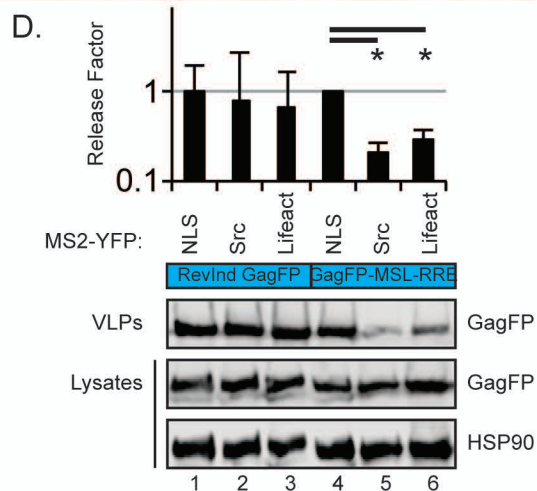

## Figure 6

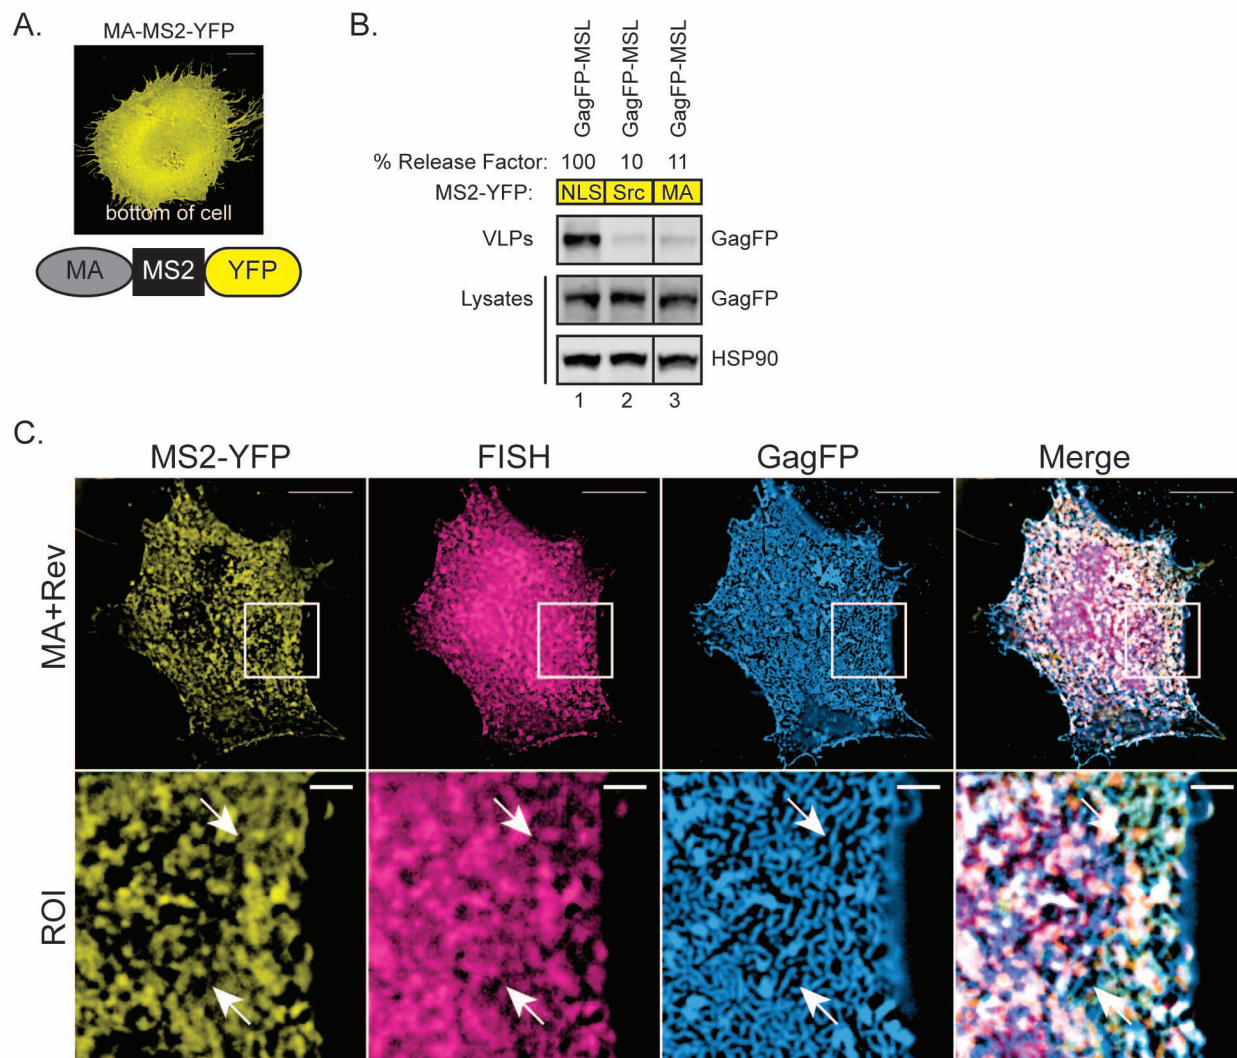



## Figure 7

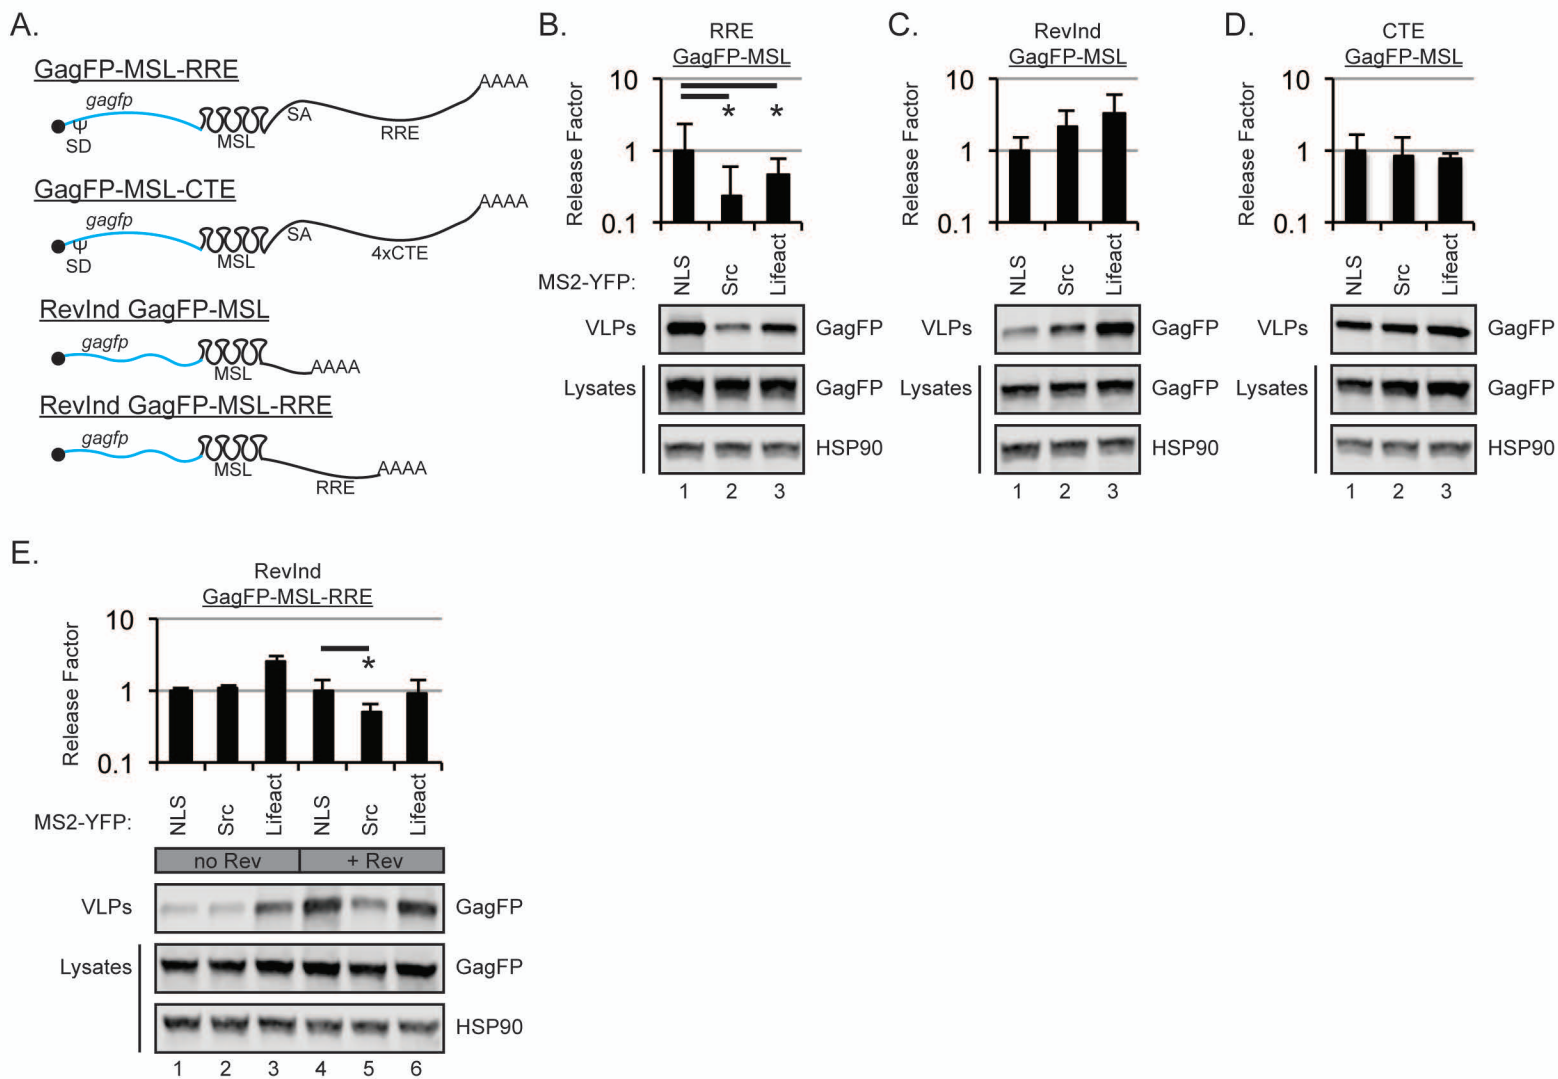

## Figure 8

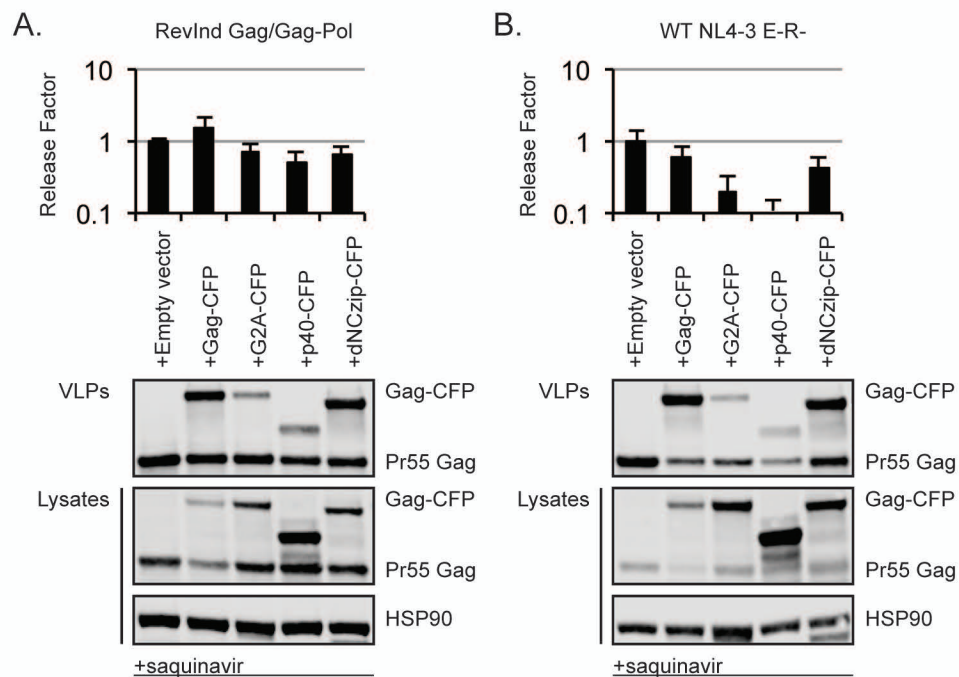

Figure 9

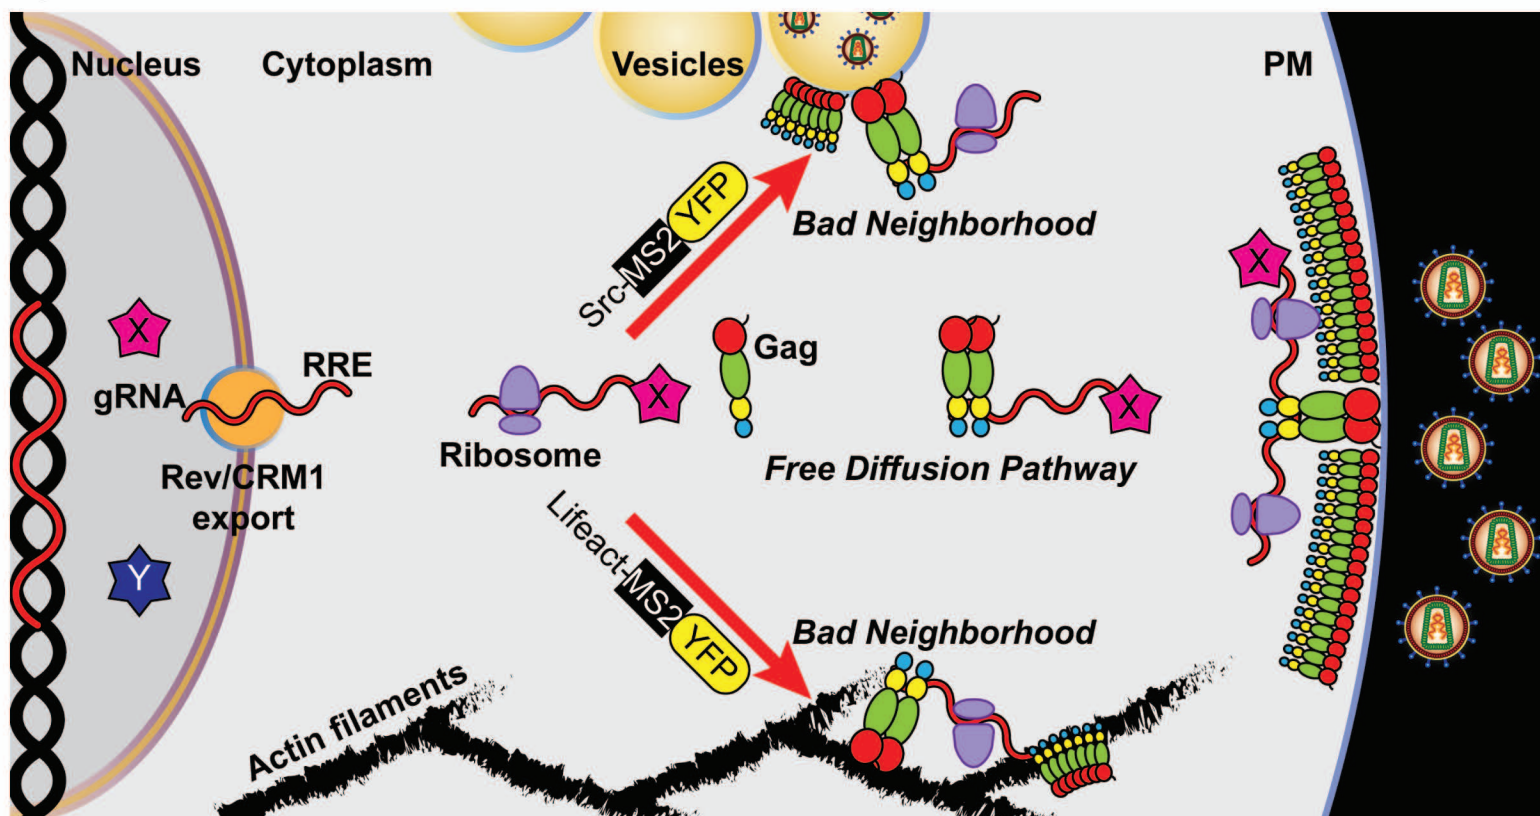

Source: http://biorxiv.org/content/10.1101/057299v1.full.pdf
